# Supplementary material for: Life course health consequences and associated annual costs of adverse childhood experiences across Europe and North America: a systematic review and meta-analysis
Source: PubMed Central journal article supplement (PMC7098477; doi:10.1016/s2468-2667(19)30145-8), 2019-09-03
Supplement: mmc1.pdf [file mmc1.pdf]

# THE LANCET

## Public Health

### **Supplementary appendix**

This appendix formed part of the original submission and has been peer reviewed. We post it as supplied by the authors.

Supplement to: Bellis MA, Hughes K, Ford K, Rodriguez GR, Sethi D, Passmore J. Life course health consequences and associated annual costs of adverse childhood experiences across Europe and North America: a systematic review and meta-analysis. *Lancet Public Health* 2019; published online Sept 13. [http://dx.doi.org/10.1016/S2468-2667\(19\)30145-8](http://dx.doi.org/10.1016/S2468-2667(19)30145-8).

## Appendix

**Table A1: Countries in each region**

| Europe*                                                                                                                                                                                                                                                                                                                                                                                                                                                                                                                                                                                 | North America                  |
|-----------------------------------------------------------------------------------------------------------------------------------------------------------------------------------------------------------------------------------------------------------------------------------------------------------------------------------------------------------------------------------------------------------------------------------------------------------------------------------------------------------------------------------------------------------------------------------------|--------------------------------|
| Albania, Armenia, Andorra, Austria, Azerbaijan, Belarus, Belgium, Bosnia and Herzegovina, Bulgaria, Croatia, Cyprus, Czech Republic, Denmark, Estonia, Finland, France, Georgia, Germany, Greece, Hungary, Iceland, Ireland, Israel, Italy, Kazakhstan, Kyrgyz Republic, Latvia, Lithuania, Luxembourg, The former Yugoslav Republic of Macedonia, Malta, Moldova, Montenegro, Netherlands, Norway, Poland, Portugal, Romania, Russian Federation, Serbia, Slovak Republic, Slovenia, Spain, Switzerland, Sweden, Tajikistan, Turkey, Turkmenistan, Ukraine, United Kingdom, Uzbekistan | Bermuda, Canada, United States |

\*Monaco and San Marino excluded due to lack of GBD data availability.

**Table A2: Study definitions within each outcome category**

| Outcome                | GBD matched (ID)                   | Study definitions (number of samples, time frame)                                                                                                                                                                                                                                                                               | References                |
|------------------------|------------------------------------|---------------------------------------------------------------------------------------------------------------------------------------------------------------------------------------------------------------------------------------------------------------------------------------------------------------------------------|---------------------------|
| <b>Risk factors</b>    |                                    |                                                                                                                                                                                                                                                                                                                                 |                           |
| Harmful alcohol use    | Alcohol use (102)                  | Self-reported alcoholic (1, L); Self-reported problem drinker or alcoholic (1, L); Six or more standard drinks on one occasion at least weekly (2, C); Binge drinking (2, NR); >2 (male)/>1 (female) drinks daily (1, C); AUDIT C score 5+ (1, C); AUDIT C score $\geq 9$ (1, NR)                                               | 1-9                       |
| Illicit drug use       | Drug use (103)                     | Street drug use (2, L); Cannabis use (3, L)                                                                                                                                                                                                                                                                                     | 1-4,7                     |
| Smoking                | Smoking (99)                       | Smoker (8, C); Daily smoking (3, C)                                                                                                                                                                                                                                                                                             | 1-11                      |
| Obesity                | High body mass index (108)         | BMI >25 (1, C); BMI $\geq 25$ (1, C); BMI $\geq 30$ (3, C); BMI $\geq 35$ (1, C); BMI $\geq 40$ (1, C)                                                                                                                                                                                                                          | 1,3,5-7,11,12             |
| <b>Causes</b>          |                                    |                                                                                                                                                                                                                                                                                                                                 |                           |
| Anxiety                | Anxiety disorders (571)            | Anxiety (1, L); GAD-2 (1, C); Trouble with nervousness (1, NR); Self-reported treatment for anxiety (1, L)                                                                                                                                                                                                                      | 1,8,9,13                  |
| Depression             | Major depressive disorder (568)    | Medically recorded treatment for: depression (1, over 7 year period in adulthood), Unipolar depressive disorder (1, age 15-34 years); Self-reported depressed affect (1, L); Self-reported diagnosis for depression (2; L); Self-reported depression (1, C); Depressive symptoms: (1, C, PHQ-9; 1, C, PHQ-2); Depression (1, L) | 1,5,6,8,9,11,13-16        |
| Cancer                 | Neoplasms (410)                    | Any cancer (6, L)                                                                                                                                                                                                                                                                                                               | 6,7,17-20                 |
| Cardiovascular disease | Cardiovascular diseases (491)      | Cardiovascular disease (4, L); Heart disease (including coronary heart disease and ischaemic heart disease; 4, L); Heart attack (1, L)                                                                                                                                                                                          | 5-7,9,11,12,17,20,21      |
| Diabetes               | Diabetes mellitus (587)            | Diabetes (5, L; 1, NR); Type 2 diabetes (2, L); Diabetes or high blood sugar (1; treatment in last 12 months)                                                                                                                                                                                                                   | 5-7,9,11,12,17,18,20      |
| Respiratory disease    | Chronic respiratory diseases (508) | Respiratory disease (3, L); COPD (2, L; 1, NR); Chronic bronchitis, emphysema, or COPD (1, L); Chronic bronchitis or emphysema (1, L); Lung disease (1, L); Asthma (2, L)                                                                                                                                                       | 3,6,7,9,11,17,18,20,22,23 |

AUDIT=Alcohol Use Disorders Identification Test; BMI=Body Mass Index; C=current; COPD=Chronic obstructive pulmonary disease; GAD=General Anxiety Disorder; GBD=Global Burden of Disease; ID=Identification; L=lifetime; NR=not reported; PHQ=Patient Health Questionnaire.

***Panel A. Adverse childhood experience categories measured by included studies\****

| <b>Type of childhood adversity</b>                 | <b>Number of studies</b> |
|----------------------------------------------------|--------------------------|
| Physical abuse                                     | 20                       |
| Household substance abuse                          | 22                       |
| Sexual abuse                                       | 19                       |
| Household mental illness                           | 19                       |
| Exposure to domestic violence                      | 16                       |
| Emotional/psychological/verbal abuse               | 17                       |
| Parental separation/divorce                        | 19                       |
| Household member incarcerated/criminality          | 19                       |
| Neglect                                            | 8                        |
| Parental death                                     | 3                        |
| Child welfare intervention (e.g. out of home care) | 3                        |

Other types (measured in <3 studies) include:

Family welfare/financial difficulties; residential instability; parental illness; parental disability; separation from mother; frightening experience; sent away from home; child incarcerated; educational difficulties (e.g. school drop-out); lost home to fire, flood or natural disaster

\*Questions used to determine ACEs varied between studies.

**Table A3: DALYs for risk factors, excluding DALYs for causes of ill health studied\***

| Risk factor         | Region        | DALYs (thousands) excluding those for causes studied* | ACE-attributable DALYs (thousands) excluding those for causes studied* |        |          | ACE-attributable costs (US\$ billions) excluding those for causes studied* |        |          |
|---------------------|---------------|-------------------------------------------------------|------------------------------------------------------------------------|--------|----------|----------------------------------------------------------------------------|--------|----------|
|                     |               |                                                       | 1 ACE                                                                  | ≥2ACEs | All ACEs | 1 ACE                                                                      | ≥2ACEs | All ACEs |
| Harmful alcohol use | Europe        | 14880                                                 | 1347                                                                   | 2325   | 3673     | 32                                                                         | 55     | 87       |
|                     | North America | 3708                                                  | 278                                                                    | 758    | 1036     | 16                                                                         | 44     | 60       |
| Illicit drug use    | Europe        | 5333                                                  | 571                                                                    | 1247   | 1818     | 13                                                                         | 29     | 43       |
|                     | North America | 6833                                                  | 497                                                                    | 2308   | 2806     | 29                                                                         | 134    | 163      |
| Smoking             | Europe        | 6682                                                  | 371                                                                    | 845    | 1216     | 9                                                                          | 20     | 29       |
|                     | North America | 1657                                                  | 69                                                                     | 325    | 393      | 4                                                                          | 19     | 23       |
| Obesity             | Europe        | 4647                                                  | 66                                                                     | 193    | 260      | 2                                                                          | 5      | 6        |
|                     | North America | 2740                                                  | 45                                                                     | 200    | 246      | 3                                                                          | 12     | 14       |

ACE=Adverse childhood experience; DALY=Disability Adjusted Life Year; \*Anxiety, depression, cancer, cardiovascular disease, respiratory disease, diabetes.

**Table A4: Sensitivity analysis: ACE-attributable DALYs (thousands) for risk factors, causes and summed totals**

| Risk factors                                                           | Region | Best estimate (Age 15+, pooled relative risks, pooled ACE prevalence) |      |      | Based on PAFs generated using lower CIs for pooled relative risks |      |      | Based on PAFs generated using upper CIs for pooled relative risks |       |       | Based on PAFs generated using lower CIs for pooled prevalence of ACEs |      |      | Based on PAFs generated using upper CIs for pooled prevalence of ACEs |      |      | Limited to DALYs for 15–69 year olds |      |      | Based on PAFs generated using data from general population samples only† |      |      |
|------------------------------------------------------------------------|--------|-----------------------------------------------------------------------|------|------|-------------------------------------------------------------------|------|------|-------------------------------------------------------------------|-------|-------|-----------------------------------------------------------------------|------|------|-----------------------------------------------------------------------|------|------|--------------------------------------|------|------|--------------------------------------------------------------------------|------|------|
|                                                                        |        | ACEs                                                                  | ACEs | ACEs | ACEs                                                              | ACEs | ACEs | ACEs                                                              | ACEs  | ACEs  | ACEs                                                                  | ACEs | ACEs | ACEs                                                                  | ACEs | ACEs | ACEs                                 | ACEs | ACEs | ACEs                                                                     | ACEs | ACEs |
|                                                                        |        | 1                                                                     | ≥2   | All  | 1                                                                 | ≥2   | All  | 1                                                                 | ≥2    | All   | 1                                                                     | ≥2   | All  | 1                                                                     | ≥2   | All  | 1                                    | ≥2   | All  | 1                                                                        | ≥2   | All  |
| Harmful alcohol use                                                    | Eur    | 2217                                                                  | 3825 | 6042 | 1188                                                              | 534  | 1722 | 2848                                                              | 7694  | 10542 | 1869                                                                  | 3157 | 5026 | 2551                                                                  | 4480 | 7031 | 1938                                 | 3344 | 5282 | 1838                                                                     | 2181 | 4019 |
|                                                                        | NA     | 335                                                                   | 915  | 1250 | 183                                                               | 310  | 493  | 442                                                               | 1494  | 1935  | 323                                                                   | 848  | 1171 | 347                                                                   | 980  | 1326 | 317                                  | 865  | 1182 | 270                                                                      | 644  | 914  |
| Illicit drug use                                                       | Eur    | 610                                                                   | 1333 | 1944 | 451                                                               | 1258 | 1709 | 772                                                               | 1402  | 2174  | 526                                                                   | 1124 | 1650 | 688                                                                   | 1530 | 2218 | 574                                  | 1255 | 1829 | 611                                                                      | 1282 | 1892 |
|                                                                        | NA ‡   | 514                                                                   | 2385 | 2899 | 379                                                               | 2191 | 2571 | 644                                                               | 2567  | 3211  | 502                                                                   | 2239 | 2741 | 525                                                                   | 2523 | 3048 | 496                                  | 2301 | 2797 | –                                                                        | –    | –    |
| Smoking                                                                | Eur    | 2142                                                                  | 4873 | 7015 | 1601                                                              | 4316 | 5917 | 2680                                                              | 5429  | 8110  | 1781                                                                  | 3966 | 5747 | 2499                                                                  | 5788 | 8288 | 1513                                 | 3443 | 4956 | 1480                                                                     | 5078 | 6558 |
|                                                                        | NA     | 479                                                                   | 2274 | 2753 | 88                                                                | 1625 | 1712 | 850                                                               | 2883  | 3732  | 461                                                                   | 2102 | 2563 | 498                                                                   | 2442 | 2940 | 296                                  | 1405 | 1701 | 520                                                                      | 2277 | 2797 |
| Obesity                                                                | Eur    | 430                                                                   | 1251 | 1681 | –85                                                               | –858 | –942 | 874                                                               | 3763  | 4638  | 348                                                                   | 991  | 1338 | 516                                                                   | 1529 | 2044 | 279                                  | 812  | 1091 | 413                                                                      | 1187 | 1599 |
|                                                                        | NA     | 207                                                                   | 917  | 1124 | –11                                                               | 256  | 244  | 409                                                               | 1577  | 1986  | 196                                                                   | 837  | 1033 | 218                                                                   | 998  | 1216 | 141                                  | 623  | 764  | 118                                                                      | 644  | 762  |
| <b>Risk factors, excluding DALYs for causes of ill health studied*</b> |        |                                                                       |      |      |                                                                   |      |      |                                                                   |       |       |                                                                       |      |      |                                                                       |      |      |                                      |      |      |                                                                          |      |      |
| Harmful alcohol use                                                    | Eur    | 1347                                                                  | 2325 | 3673 | 722                                                               | 325  | 1047 | 1731                                                              | 4677  | 6408  | 1136                                                                  | 1919 | 3055 | 1550                                                                  | 2724 | 4274 | 1233                                 | 2127 | 3360 | 1117                                                                     | 1326 | 2443 |
|                                                                        | NA     | 278                                                                   | 758  | 1036 | 151                                                               | 257  | 409  | 366                                                               | 1238  | 1604  | 268                                                                   | 703  | 970  | 287                                                                   | 812  | 1099 | 256                                  | 698  | 953  | 224                                                                      | 534  | 758  |
| Illicit drug use                                                       | Eur    | 571                                                                   | 1247 | 1818 | 422                                                               | 1177 | 1598 | 722                                                               | 1311  | 2034  | 492                                                                   | 1052 | 1543 | 643                                                                   | 1431 | 2074 | 547                                  | 1195 | 1741 | 571                                                                      | 1199 | 1770 |
|                                                                        | NA     | 497                                                                   | 2308 | 2806 | 367                                                               | 2121 | 2488 | 623                                                               | 2485  | 3108  | 486                                                                   | 2168 | 2653 | 508                                                                   | 2442 | 2950 | 484                                  | 2245 | 2728 | –                                                                        | –    | –    |
| Smoking                                                                | Eur    | 371                                                                   | 845  | 1216 | 277                                                               | 748  | 1026 | 465                                                               | 941   | 1406  | 309                                                                   | 688  | 996  | 433                                                                   | 1004 | 1437 | 271                                  | 616  | 886  | 257                                                                      | 880  | 1137 |
|                                                                        | NA     | 69                                                                    | 325  | 393  | 13                                                                | 232  | 245  | 121                                                               | 412   | 533   | 66                                                                    | 300  | 366  | 71                                                                    | 349  | 420  | 44                                   | 210  | 255  | 74                                                                       | 325  | 400  |
| Obesity                                                                | Eur    | 66                                                                    | 193  | 260  | –13                                                               | –133 | –146 | 135                                                               | 582   | 717   | 54                                                                    | 153  | 207  | 80                                                                    | 236  | 316  | 34                                   | 98   | 131  | 64                                                                       | 183  | 247  |
|                                                                        | NA     | 45                                                                    | 200  | 246  | –2                                                                | 56   | 53   | 89                                                                | 345   | 434   | 43                                                                    | 183  | 226  | 48                                                                    | 218  | 266  | 25                                   | 112  | 138  | 26                                                                       | 141  | 167  |
| <b>Causes</b>                                                          |        |                                                                       |      |      |                                                                   |      |      |                                                                   |       |       |                                                                       |      |      |                                                                       |      |      |                                      |      |      |                                                                          |      |      |
| Cancer                                                                 | Eur    | 716                                                                   | 4258 | 4974 | –1057                                                             | 2523 | 1466 | 2499                                                              | 5999  | 8498  | 586                                                                   | 3415 | 4001 | 847                                                                   | 5134 | 5981 | 475                                  | 2826 | 3300 | 689                                                                      | 4052 | 4741 |
|                                                                        | NA     | 351                                                                   | 1290 | 1641 | –181                                                              | 552  | 370  | 872                                                               | 1998  | 2870  | 333                                                                   | 1178 | 1511 | 369                                                                   | 1403 | 1772 | 225                                  | 827  | 1052 | 295                                                                      | 1189 | 1483 |
| Cardiovascular disease                                                 | Eur    | 1492                                                                  | 6357 | 7848 | –218                                                              | 2454 | 2236 | 3059                                                              | 10591 | 13650 | 1223                                                                  | 5102 | 6324 | 1765                                                                  | 7660 | 9425 | 738                                  | 3144 | 3882 | 1437                                                                     | 6049 | 7486 |
|                                                                        | NA     | 496                                                                   | 2825 | 3321 | 131                                                               | 2091 | 2222 | 841                                                               | 3536  | 4378  | 475                                                                   | 2603 | 3077 | 516                                                                   | 3045 | 3561 | 258                                  | 1469 | 1727 | 546                                                                      | 2894 | 3439 |
| Respiratory disease                                                    | Eur    | 383                                                                   | 1591 | 1974 | 99                                                                | 763  | 862  | 624                                                               | 2492  | 3116  | 319                                                                   | 1296 | 1615 | 446                                                                   | 1888 | 2334 | 211                                  | 878  | 1089 | 609                                                                      | 1839 | 2448 |
|                                                                        | NA     | 298                                                                   | 1410 | 1707 | 197                                                               | 1007 | 1204 | 384                                                               | 1802  | 2185  | 287                                                                   | 1307 | 1595 | 308                                                                   | 1509 | 1817 | 159                                  | 752  | 911  | 268                                                                      | 1280 | 1549 |

|                                                                                                               |       |      |       |       |      |      |      |       |       |       |      |       |       |      |       |       |      |       |       |      |       |       |
|---------------------------------------------------------------------------------------------------------------|-------|------|-------|-------|------|------|------|-------|-------|-------|------|-------|-------|------|-------|-------|------|-------|-------|------|-------|-------|
| Diabetes                                                                                                      | Eur   | 41   | 636   | 677   | -244 | 185  | -59  | 314   | 1117  | 1432  | 33   | 506   | 539   | 49   | 773   | 821   | 26   | 409   | 436   | 39   | 604   | 643   |
|                                                                                                               | NA    | 104  | 209   | 313   | 16   | -39  | -23  | 185   | 457   | 643   | 99   | 190   | 289   | 110  | 228   | 338   | 71   | 142   | 213   | 115  | 199   | 314   |
| Depression                                                                                                    | Eur   | 406  | 807   | 1213  | 393  | 736  | 1129 | 419   | 878   | 1297  | 345  | 670   | 1015  | 464  | 939   | 1403  | 344  | 684   | 1029  | 394  | 774   | 1168  |
|                                                                                                               | NA    | 95   | 703   | 798   | 49   | 562  | 611  | 134   | 833   | 967   | 93   | 660   | 753   | 97   | 743   | 840   | 89   | 662   | 751   | 78   | 695   | 774   |
| Anxiety                                                                                                       | Eur † | 252  | 714   | 966   | 106  | 604  | 711  | 396   | 817   | 1213  | 215  | 594   | 809   | 288  | 829   | 1117  | 224  | 633   | 857   | 245  | 685   | 930   |
|                                                                                                               | NA    | 25   | 597   | 622   | -150 | 276  | 127  | 172   | 857   | 1029  | 24   | 557   | 581   | 25   | 636   | 662   | 23   | 552   | 575   | 8    | 664   | 672   |
| Summed total (DALYs for causes plus DALYs for risk factors excluding those for causes of ill health studied*) |       |      |       |       |      |      |      |       |       |       |      |       |       |      |       |       |      |       |       |      |       |       |
|                                                                                                               | Eur   | 5645 | 18973 | 24618 | 488  | 9382 | 9870 | 10365 | 29406 | 39771 | 4710 | 15395 | 20105 | 6567 | 22616 | 29183 | 4102 | 12610 | 16712 | 5423 | 17590 | 23013 |
|                                                                                                               | NA    | 2257 | 10626 | 12883 | 591  | 7115 | 7706 | 3789  | 13963 | 17751 | 2173 | 9848  | 12021 | 2340 | 11386 | 13726 | 1634 | 7669  | 9303  | -    | -     | -     |

ACE=Adverse childhood experience; CI=Confidence interval; DALY=Disability Adjusted Life Year; Eur=European studies; NA=North American studies; na=not applicable, no general population studies available for illicit drug use and consequently summed total cannot be calculated; PAFs=Population attributable fractions. \*Anxiety, depression, cancer, cardiovascular disease, respiratory disease, diabetes. †Excluding Anda et al, 2006<sup>1</sup>, Bellis et al 2014<sup>4</sup>, Dong et al, 2004<sup>21</sup>, Felitti et al, 1998<sup>18</sup>, Poole et al, 2017<sup>16</sup>, Wainwright et al, 2001<sup>23</sup>. ‡ Based on a single study.

**Webfigure 1a: Prevalence of 1 ACE in European studies: summary meta-analysis plot (random effects)**

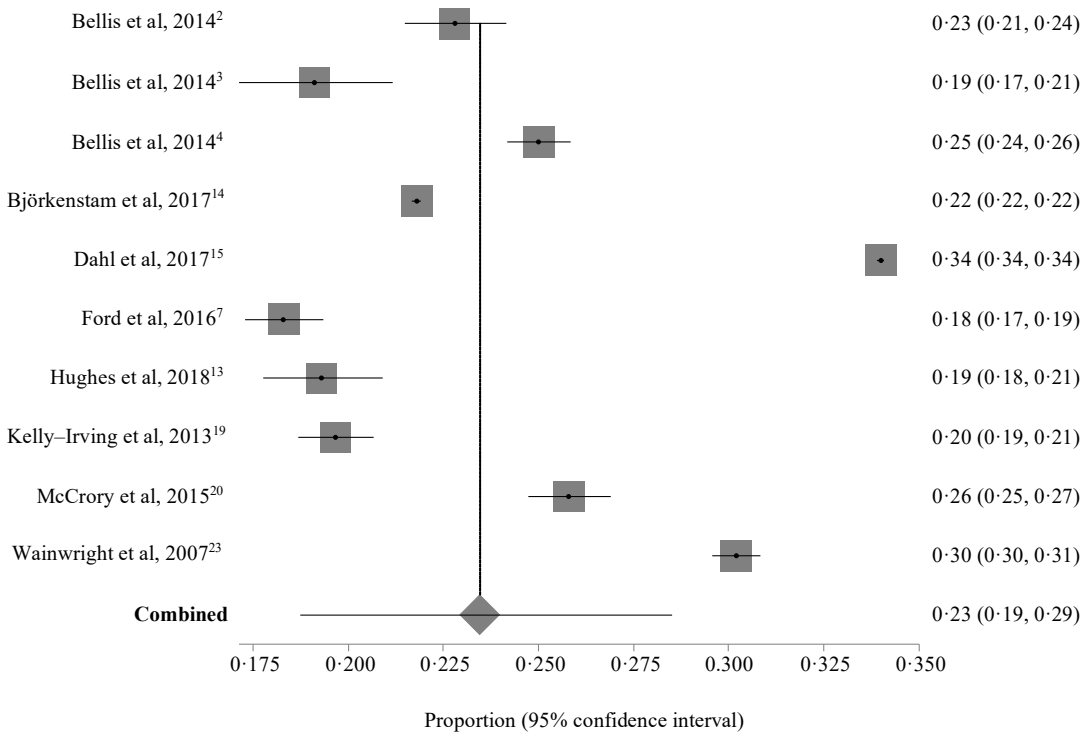

All studies:  $I^2 = 100\%$  (95% CI = 100% to 100%); Cochran Q = 25,265.503483 (df = 9)  $P < 0.0001$ .

**Webfigure 1b: Prevalence of  $\geq 2$  ACEs in European studies: summary meta-analysis plot (random effects)**

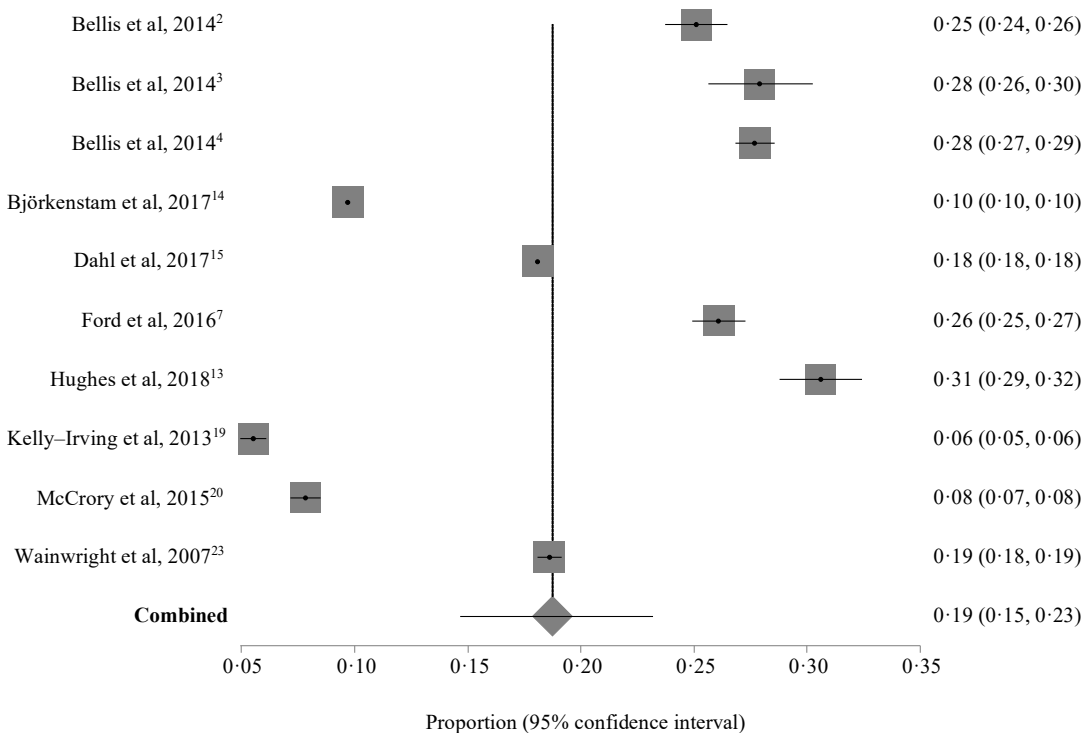

All studies:  $I^2 = 100\%$  (95% CI = 100% to 100%); Cochran Q = 22,688.577044 (df = 9)  $P < 0.0001$ .

**Webfigure 2a: Prevalence of 1 ACE in North American studies: summary meta-analysis plot (random effects)**

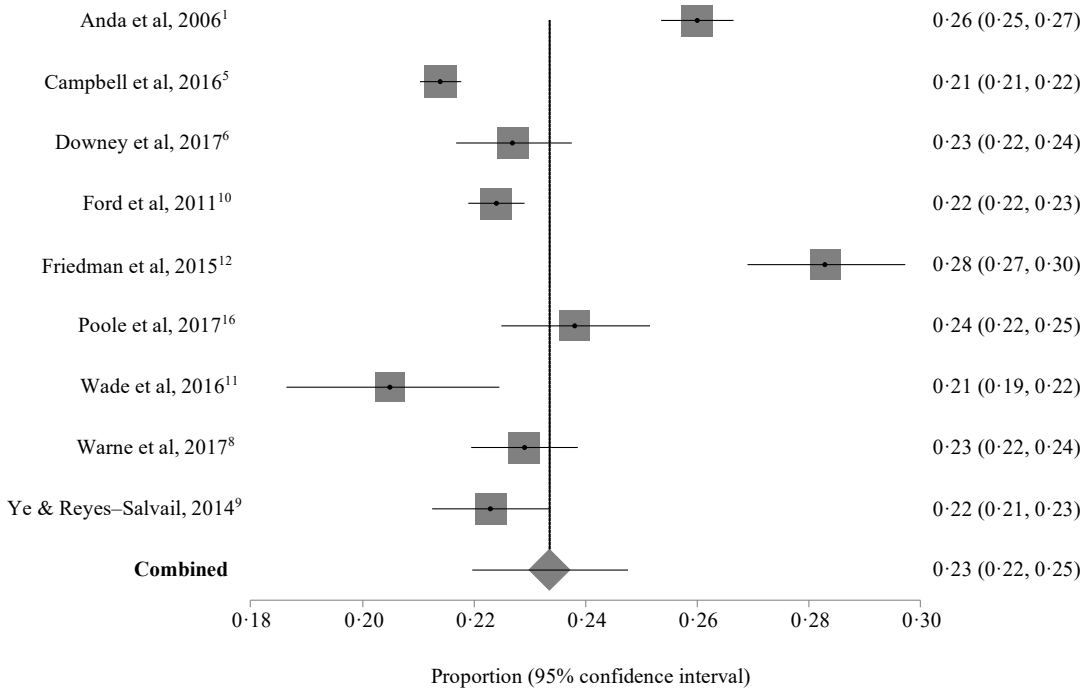

All studies:  $I^2 = 96.5\%$  (95% CI = 95.3% to 97.2%); Cochran Q = 226.2931 (df = 8)  $P < 0.0001$ .

**Webfigure 2b: Prevalence of  $\geq 2$  ACEs in North American studies: summary meta-analysis plot (random effects)**

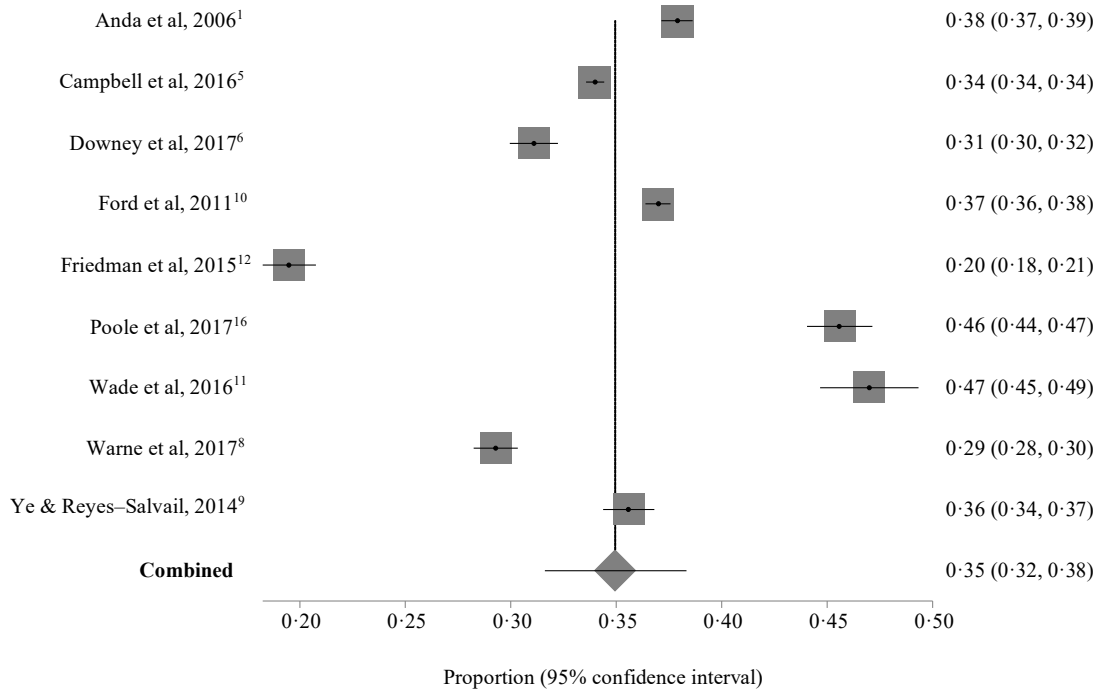

All studies:  $I^2 = 99.3\%$  (95% CI = 99.2% to 99.3%); Cochran Q = 1,073.641277 (df = 8)  $P < 0.0001$ .



**Webfigure 3: Prevalence of ACEs: Funnel plot analysis**

**a) Europe: 1 ACE**

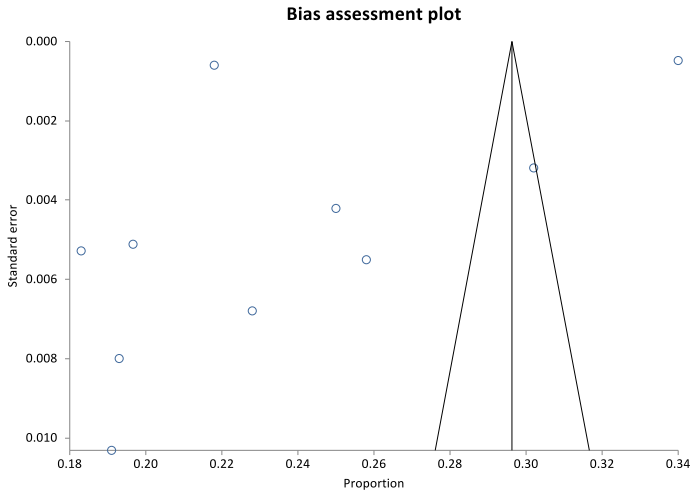

Begg–Mazumdar: Kendall's tau  $-0.155556$ ,  $P=0.4843$ ;  
 Egger: bias  $-15.697844$  (95%CI  $-67.064191$  to  $35.668503$ )  $P=0.501$ .

**b) Europe:  $\geq 2$  ACEs**

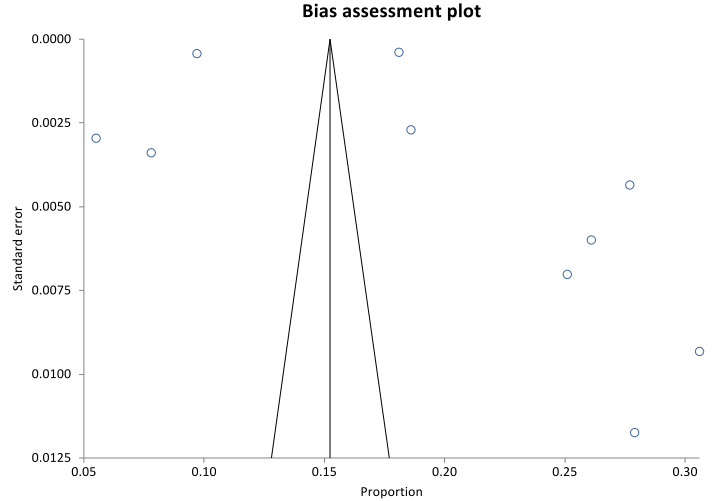

Begg–Mazumdar: Kendall's tau  $0.022222$ ,  $P>0.9999$ ;  
 Egger: bias  $7.589836$  (95%CI  $-42.235722$  to  $57.415395$ )  $P=0.7345$ .

**c) North America: 1 ACE**

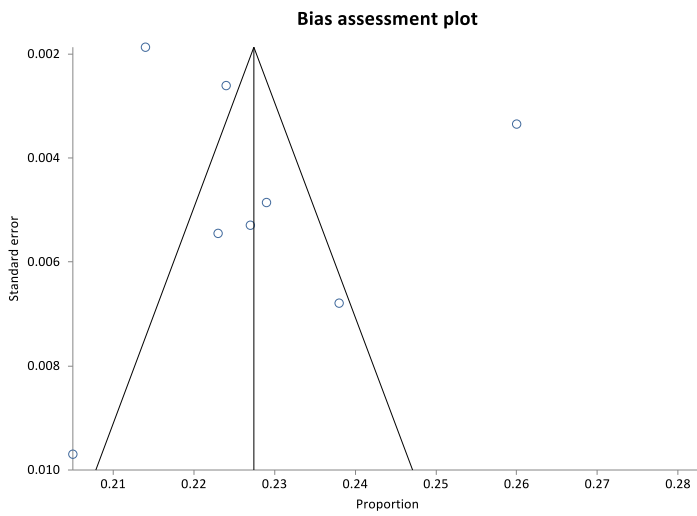

Begg–Mazumdar: Kendall's tau  $0.166667$ ,  $P=0.6122$ ;  
 Egger: bias  $4.483225$  (95% CI  $-3.793316$  to  $12.759766$ )  $P=0.241$ .

**d) North America:  $\geq 2$  ACEs**

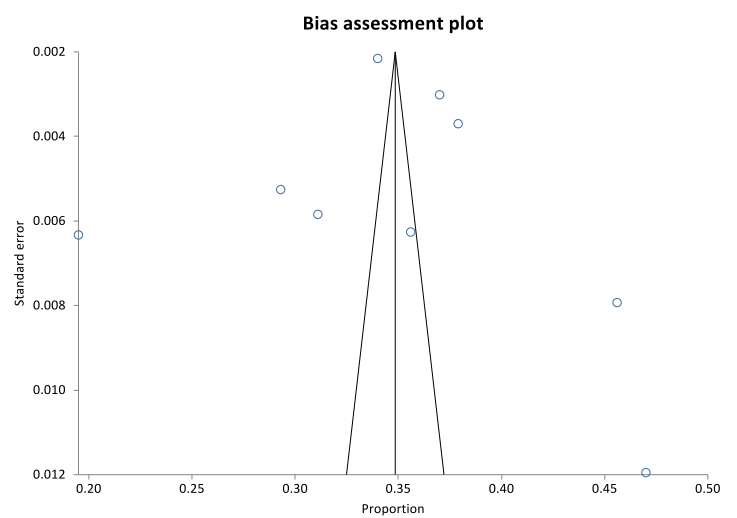

Begg–Mazumdar: Kendall's tau  $=0.166667$ ,  $P=0.6122$ ;  
 Egger: bias  $0.159589$  (95% CI  $-22.00291$  to  $22.322087$ )  $P=0.9869$ .

**Webfigure 4a: Increased risk of harmful alcohol use with 1 ACE: summary meta-analysis plot (random effects)**

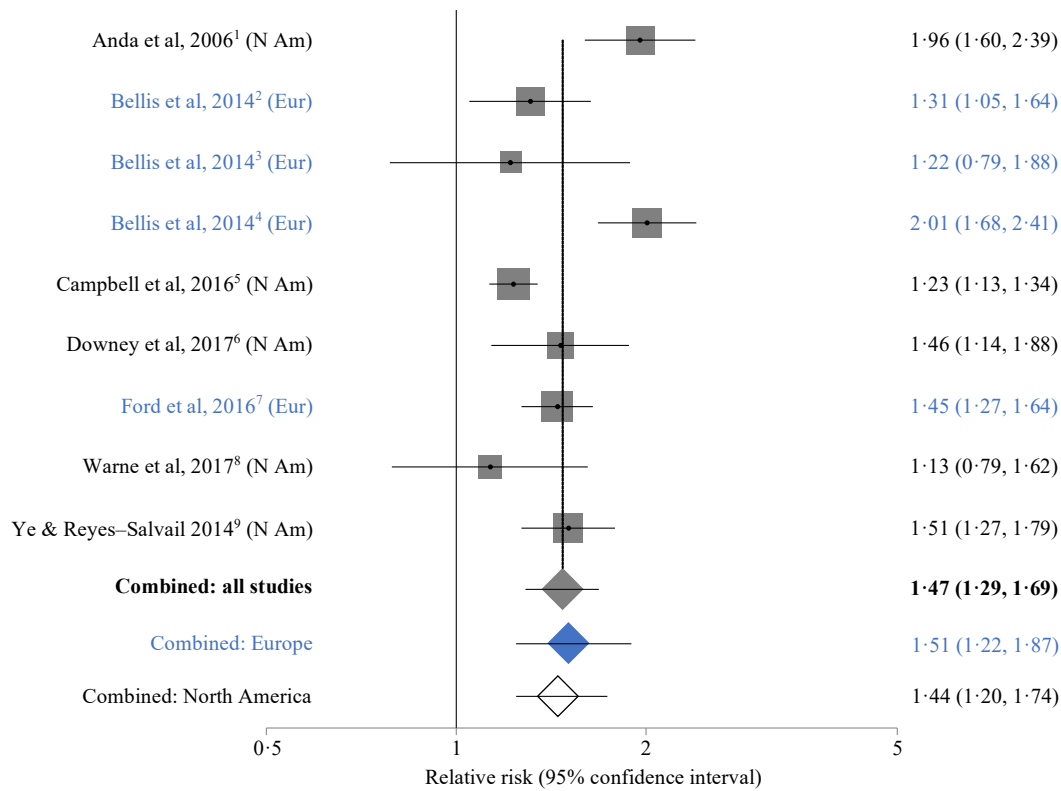

**All studies:  $I^2 = 78.4\%$  (95% CI = 53.9% to 87.1%); Cochran Q = 36.979364 (df = 8) P < 0.0001.**

**Europe (Eur):  $I^2 = 75.4\%$  (95% CI = 0% to 89.1%); Cochran Q = 12.215004 (df = 3) P = 0.0067.**

**North America (N Am):  $I^2 = 80.1\%$  (95% CI = 37.6% to 89.8%); Cochran Q = 20.13317 (df = 4) P = 0.0005.**

**Webfigure 4b: Increased risk of harmful alcohol use with  $\geq 2$  ACEs: summary meta-analysis plot (random effects)**

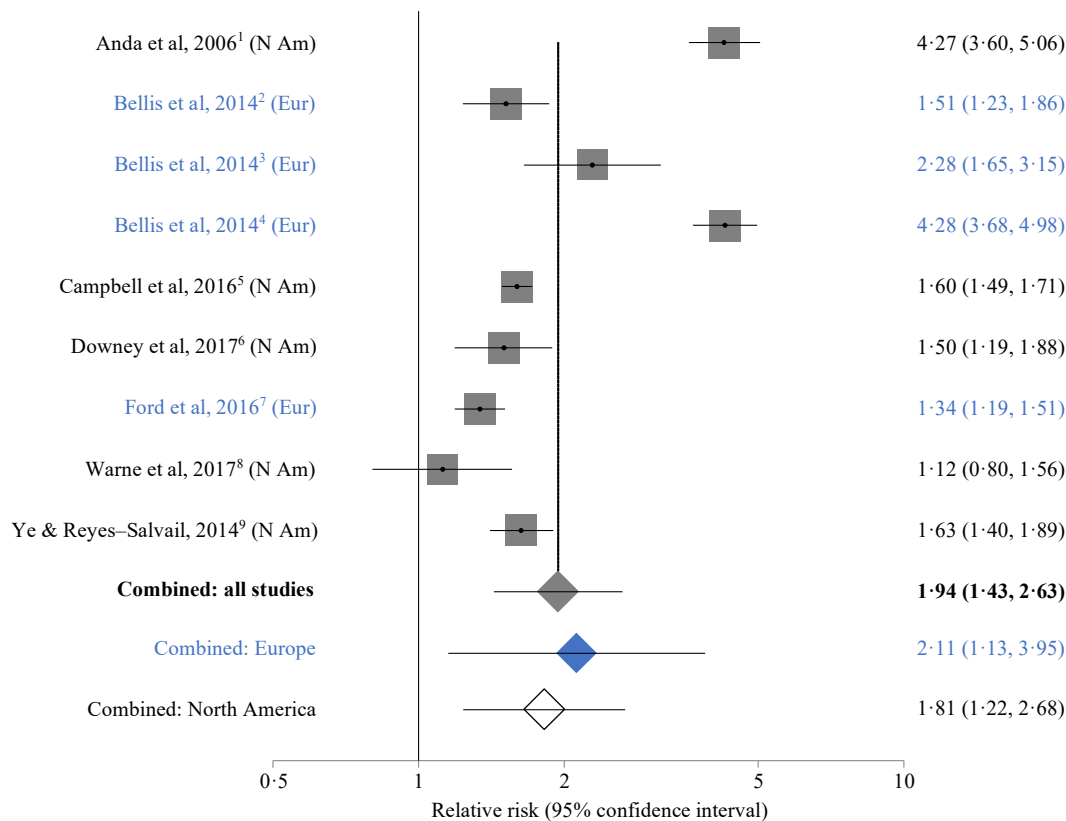

**All studies:  $I^2 = 97.1\%$  (95% CI = 96.3% to 97.7%); Cochran Q = 277.176231 (df = 8) P < 0.0001.**

**Europe (Eur):  $I^2 = 98\%$  (95% CI = 97.1% to 98.5%); Cochran Q = 149.404062 (df = 3) P < 0.0001.**

**North America (N Am):  $I^2 = 96.7\%$  (95% CI = 95.2% to 97.6%); Cochran Q = 122.940595 (df = 4) P < 0.0001.**

**Webfigure 5a: Increased risk of illicit drug use with 1 ACE: summary meta-analysis plot (random effects)**

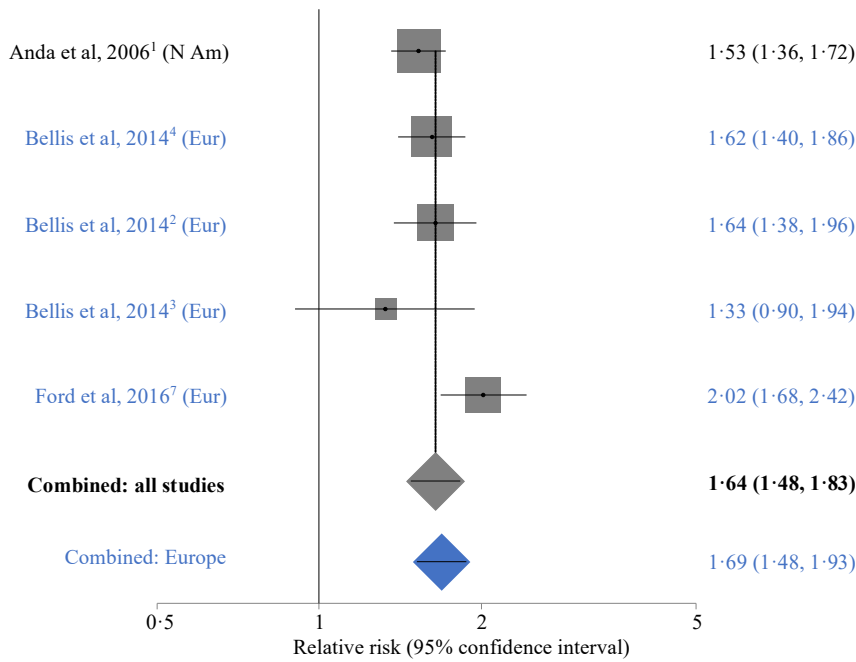

**All studies:  $I^2 = 46.4\%$  (95% CI = 0% to 78.8%); Cochran Q = 7.459456 (df = 4) P = 0.1135.**  
 Europe (Eur):  $I^2 = 45.7\%$  (95% CI = 0% to 80.7%); Cochran Q = 5.520515 (df = 3) P = 0.1374.

**Webfigure 5b: Increased risk of illicit drug use with  $\geq 2$  ACEs: summary meta-analysis plot (random effects)**

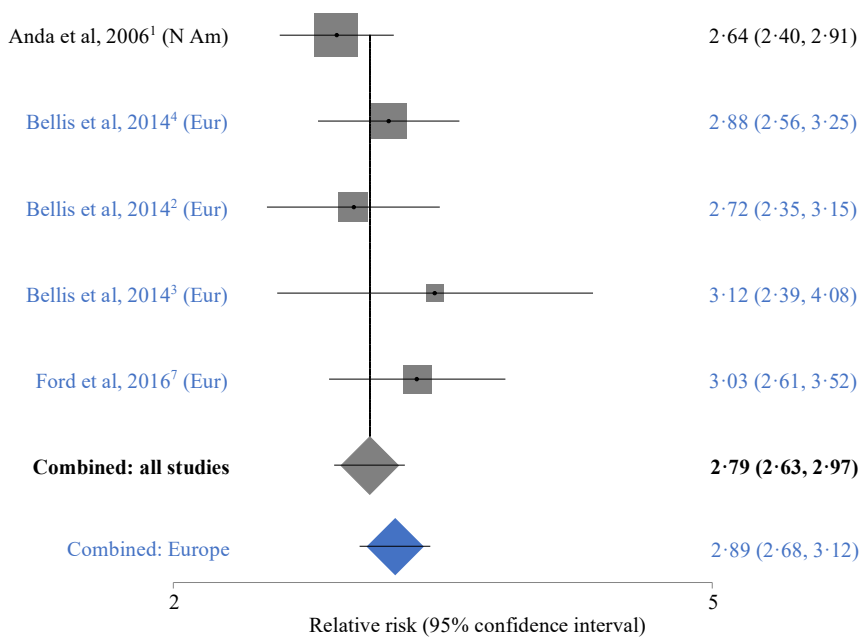

**All studies:  $I^2 = 0\%$  (95% CI = 0% to 64.1%); Cochran Q = 3.501311 (df = 4) P = 0.4777.**  
 Europe (Eur):  $I^2 = 0\%$  (95% CI = 0% to 67.9%); Cochran Q = 1.357401 (df = 3) P = 0.7155.

**Webfigure 6a: Increased risk of smoking with 1 ACE: summary meta-analysis plot (random effects)**

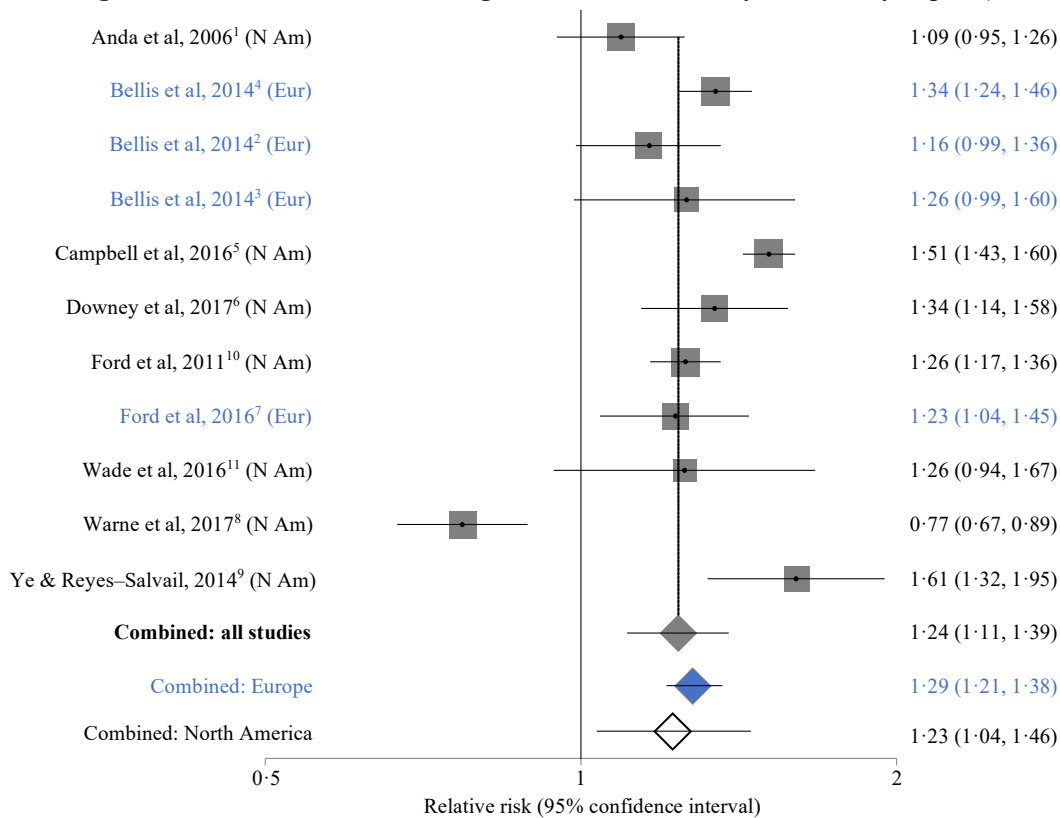

**All studies:**  $I^2 = 88.9\%$  (95% CI = 82.5% to 92.3%); Cochran Q = 90.344835 (df = 10)  $P < 0.0001$ .  
**Europe (Eur):**  $I^2 = 1\%$  (95% CI = 0% to 68.2%); Cochran Q = 3.030147 (df = 3)  $P = 0.387$ .  
**North America (N Am):**  $I^2 = 93.1\%$  (95% CI = 88.9% to 95.2%); Cochran Q = 86.921418 (df = 6)  $P < 0.0001$ .

**Webfigure 6b: Increased risk of smoking with  $\geq 2$  ACEs: summary meta-analysis plot (random effects)**

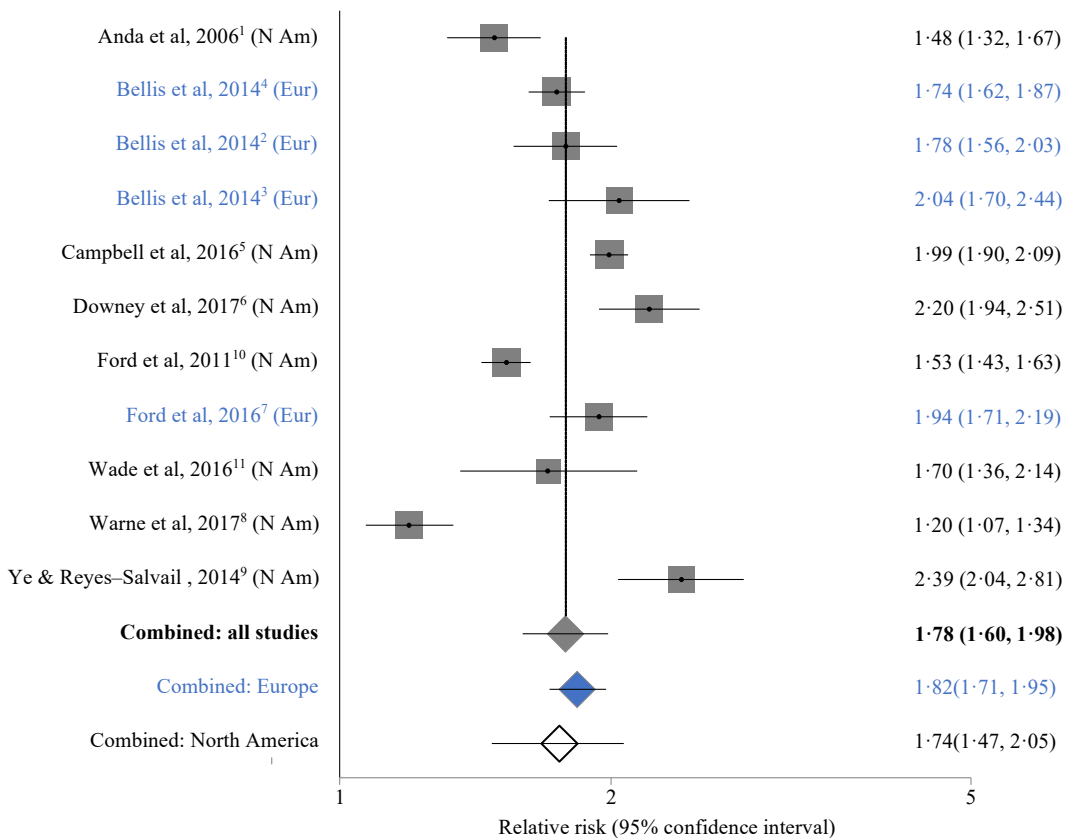

**All studies:**  $I^2 = 92.2\%$  (95% CI = 88.5% to 94.2%); Cochran Q = 127.650374 (df = 10)  $P < 0.0001$ .  
**Europe (Eur):**  $I^2 = 25.9\%$  (95% CI = 0% to 75.5%); Cochran Q = 4.051301 (df = 3)  $P = 0.256$ .  
**North America (N Am):**  $I^2 = 95.1\%$  (95% CI = 92.8% to 96.4%); Cochran Q = 122.928275 (df = 6)  $P < 0.0001$ .

**Webfigure 6c: Increased risk of smoking with 1 ACE: Funnel plot analysis**

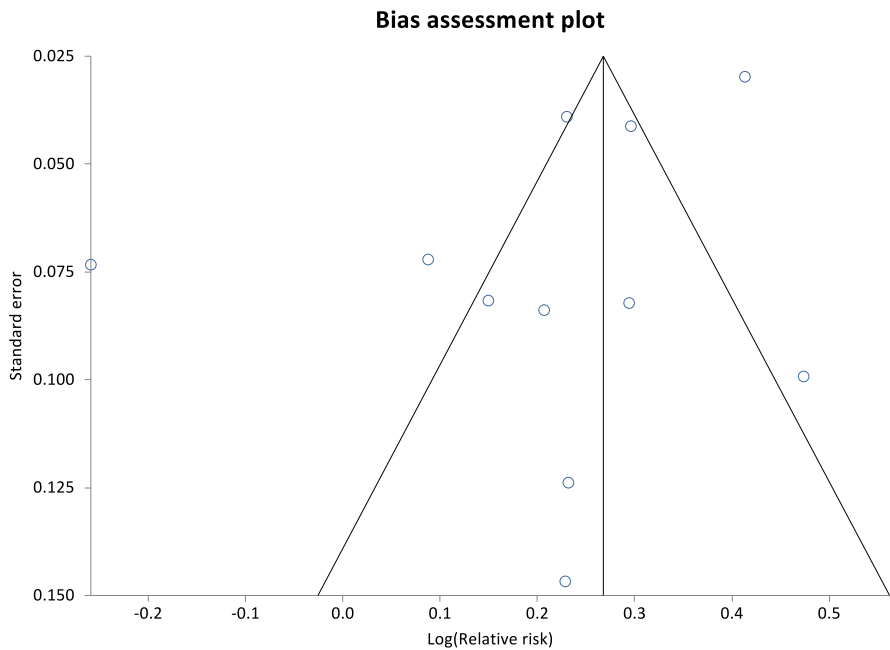

Begg–Mazumdar: Kendall's tau 0.054545, P = 0.8793; Egger: bias -2.762773 (95% CI = -7.020631 to 1.495086) P = 0.1762.

**Webfigure 6d: Increased risk of smoking with ≥2 ACEs: Funnel plot analysis**

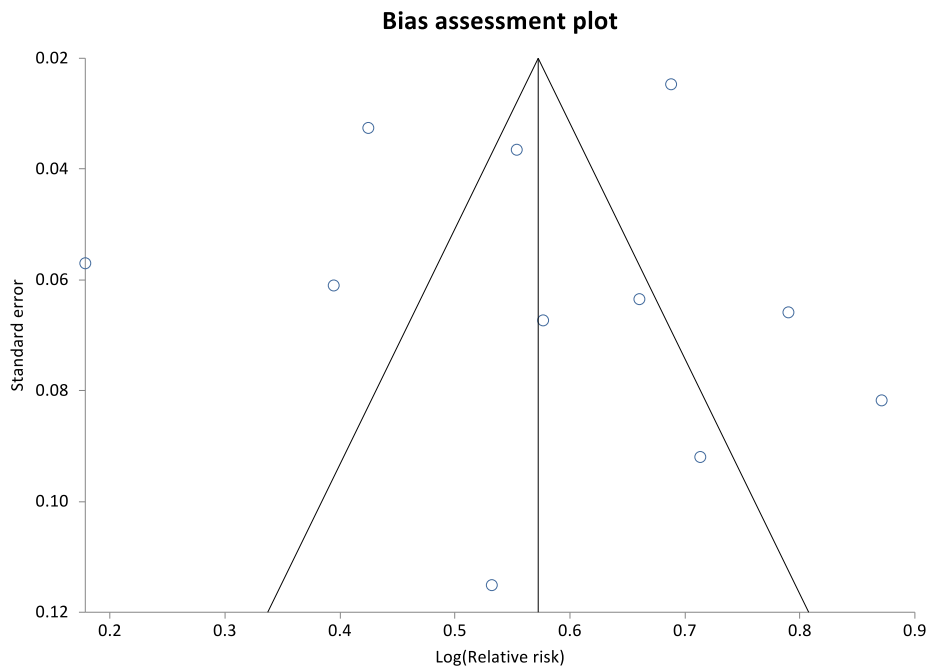

Begg–Mazumdar: Kendall's tau 0.2, P = 0.4454; Egger: bias -0.259826 (95% CI = -6.155866 to 5.636213) P = 0.9228.

**Webfigure 7a: Increased risk of obesity with 1 ACE: summary meta-analysis plot (random effects)**

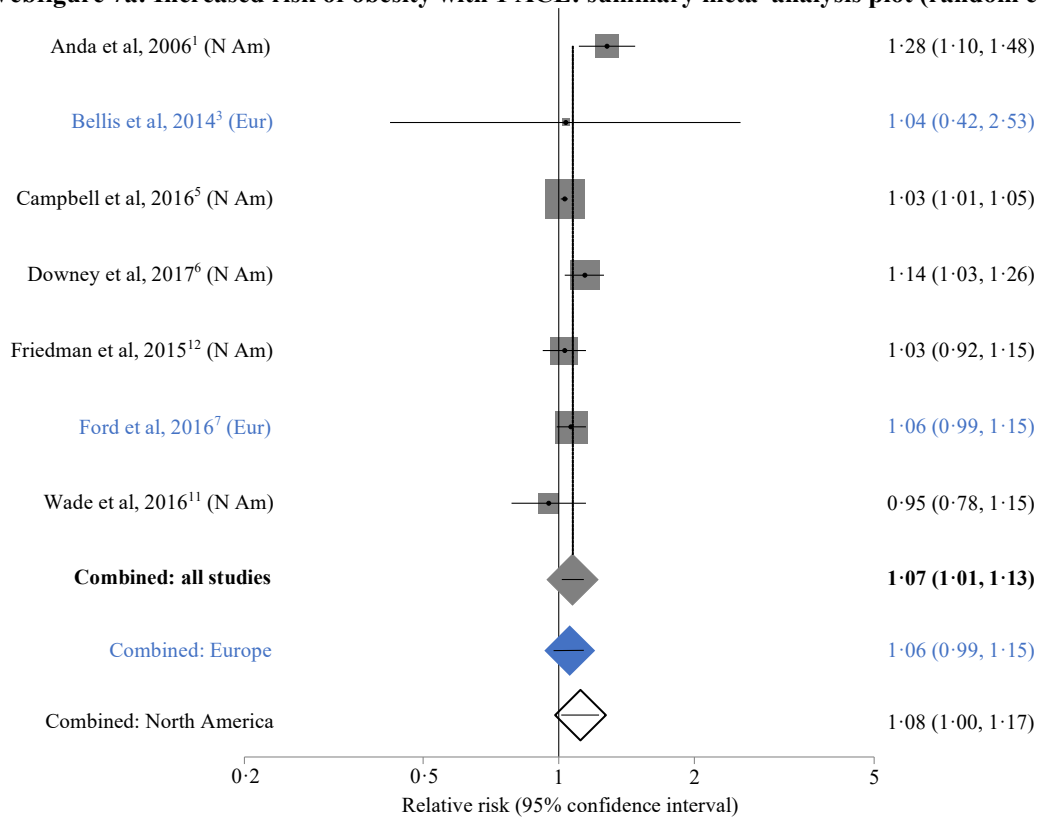

**All studies:**  $I^2 = 56.6\%$  (95% CI = 0% to 79.4%); Cochran Q = 13.837732 (df = 6) P = 0.0315.

**Europe (Eur):**  $I^2 = 0\%$  (95% CI = \*% to \*%); Cochran Q = 0.003191 (df = 1) P = 0.955.

**North America (N Am):**  $I^2 = 69.9\%$  (95% CI = 0% to 86.2%); Cochran Q = 13.28994 (df = 4) P = 0.0099.

**Webfigure 7b: Increased risk of obesity with  $\geq 2$  ACEs: summary meta-analysis plot (random effects)**

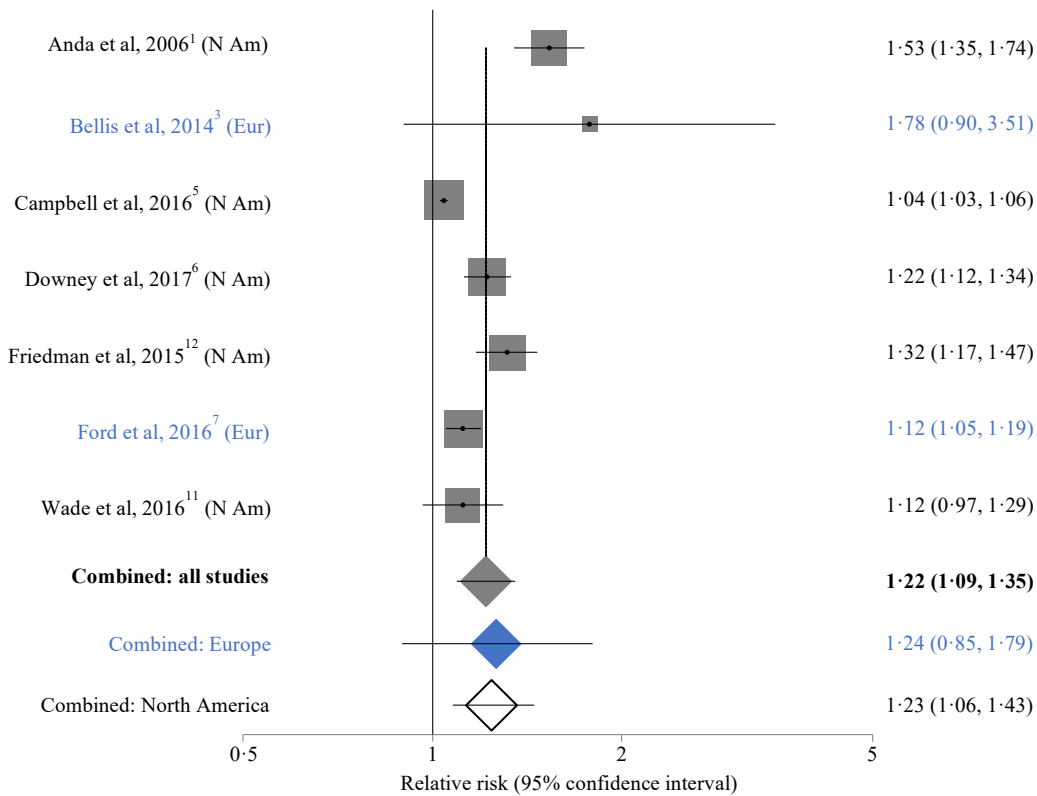

**All studies:**  $I^2 = 91.4\%$  (95% CI = 85.3% to 94.3%); Cochran Q = 70.120336 (df = 6) P < 0.0001.

**Europe (Eur):**  $I^2 = 41.2\%$  (95% CI = \*% to \*%); Cochran Q = 1.700557 (df = 1) P = 0.1922.

**North America (N Am):**  $I^2 = 93.8\%$  (95% CI = 89.1% to 95.9%); Cochran Q = 64.796406 (df = 4) P < 0.0001.

**Webfigure 8a: Increased risk of anxiety with 1 ACE: summary meta-analysis plot (random effects)**

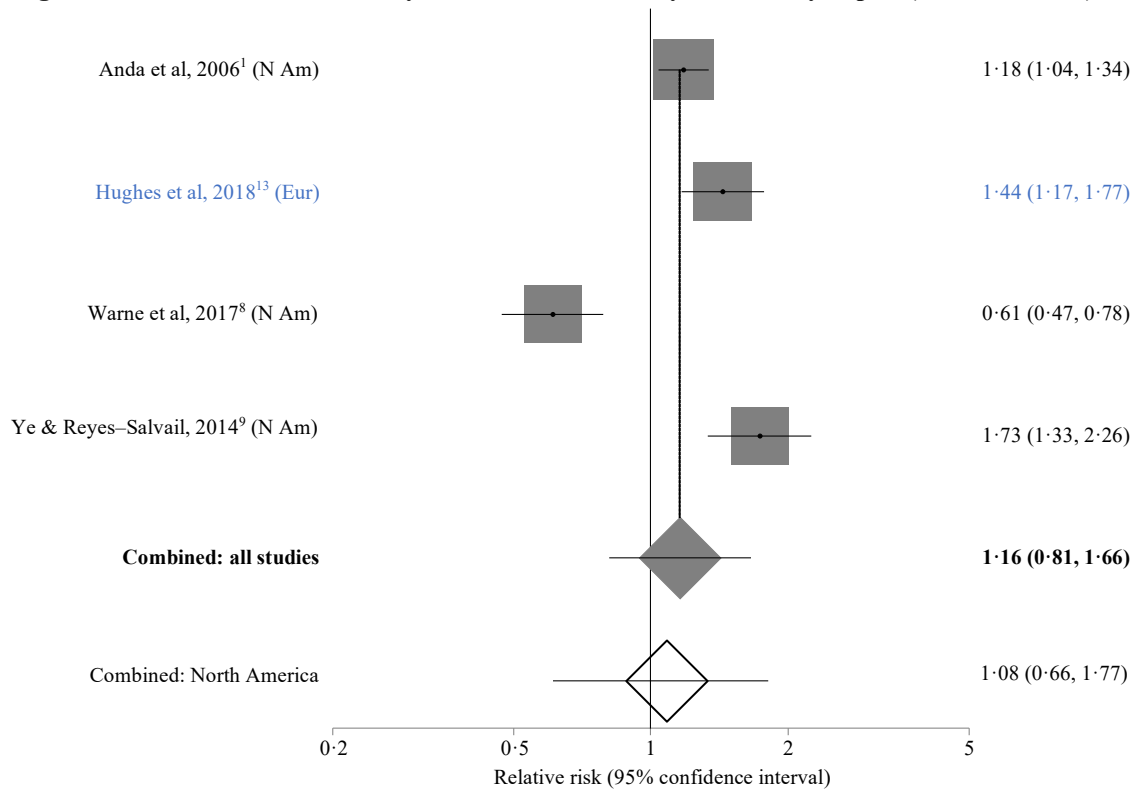

**All studies:**  $I^2 = 92\%$  (95% CI = 82.4% to 95.3%); Cochran Q = 37.629662 (df = 3)  $P < 0.0001$ .  
 North America (N Am):  $I^2 = 94\%$  (95% CI = 85.6% to 96.6%); Cochran Q = 33.115866 (df = 2)  $P < 0.0001$ .

**Webfigure 8b: Increased risk of anxiety with  $\geq 2$  ACEs: summary meta-analysis plot (random effects)**

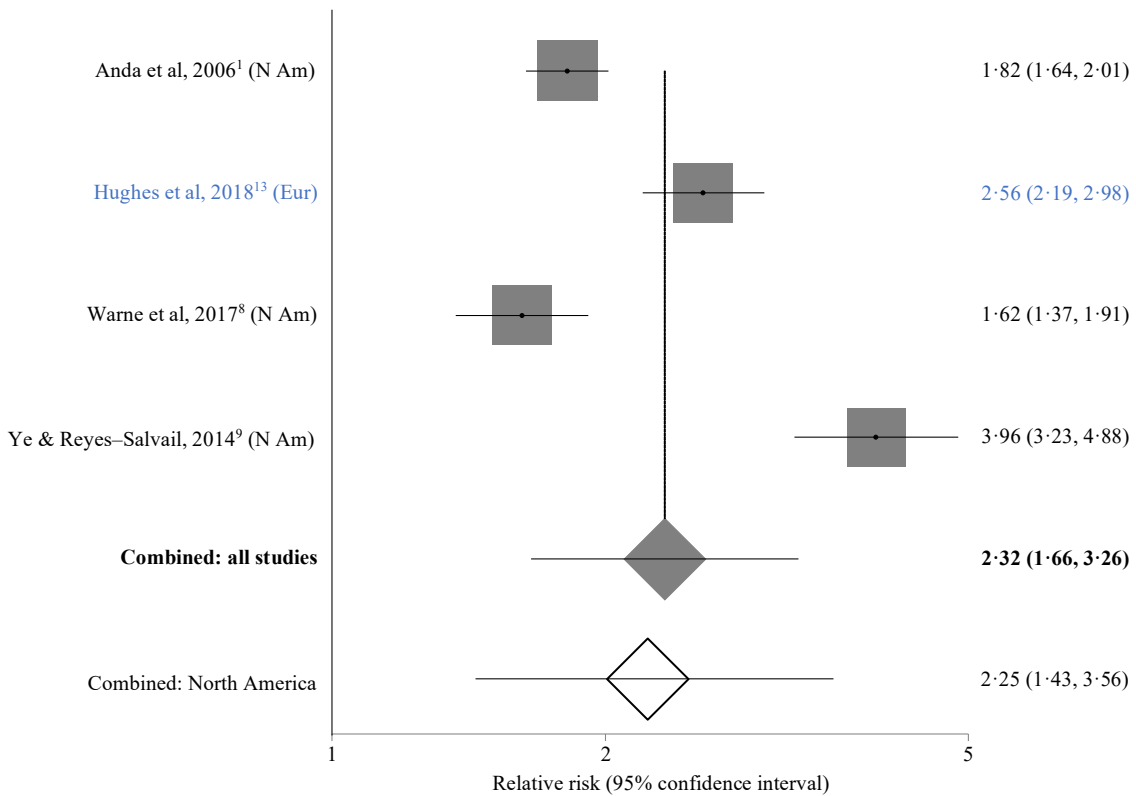

**All studies:**  $I^2 = 94.9\%$  (95% CI = 90.7% to 96.7%); Cochran Q = 59.26137 (df = 3)  $P < 0.0001$ .  
 North America (N Am):  $I^2 = 96.1\%$  (95% CI = 92.5% to 97.6%); Cochran Q = 51.610523 (df = 2)  $P < 0.0001$ .

**Webfigure 9a: Increased risk of depression with 1 ACE: summary meta-analysis plot (random effects)**

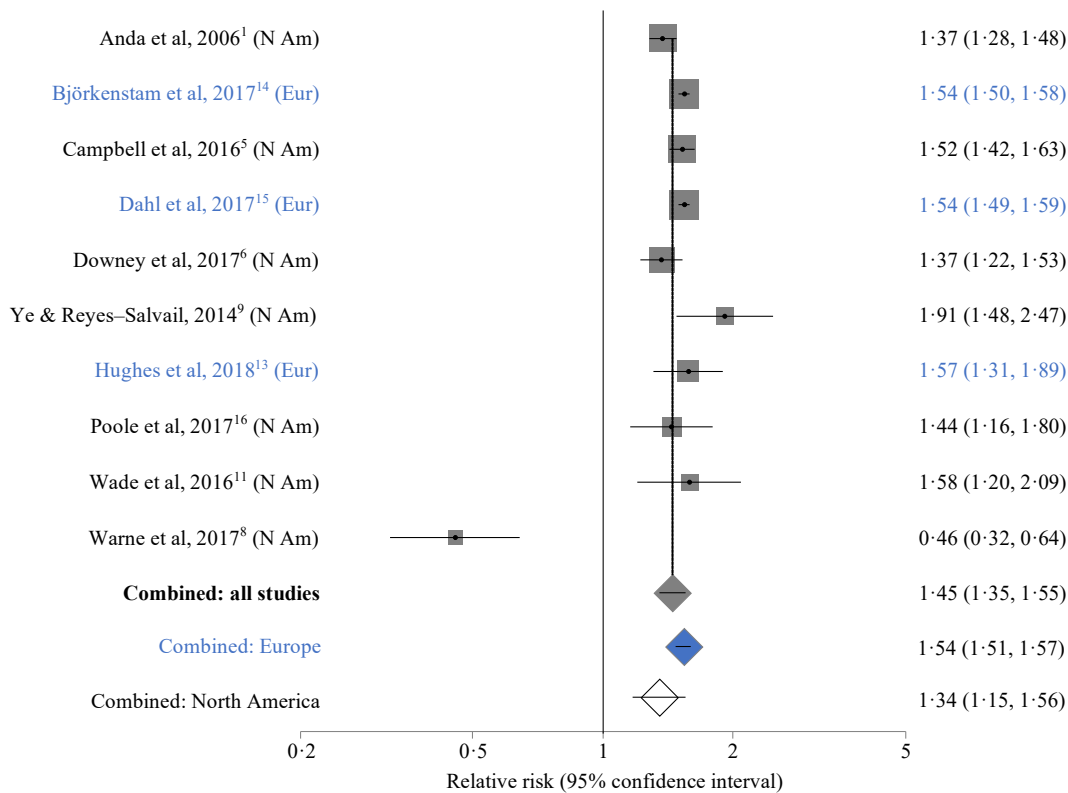

**All studies:**  $I^2 = 85.6\%$  (95% CI = 74.6% to 90.5%); Cochran Q = 62.423067 (df = 9) P < 0.0001.  
**Europe (Eur):**  $I^2 = 0\%$  (95% CI = 0% to 72.9%); Cochran Q = 0.054135 (df = 2) P = 0.9733.  
**North America (N Am):**  $I^2 = 88.6\%$  (95% CI = 78.5% to 92.8%); Cochran Q = 52.582311 (df = 6) P < 0.0001.

**Webfigure 9b: Increased risk of depression with ≥2 ACEs: summary meta-analysis plot (random effects)**

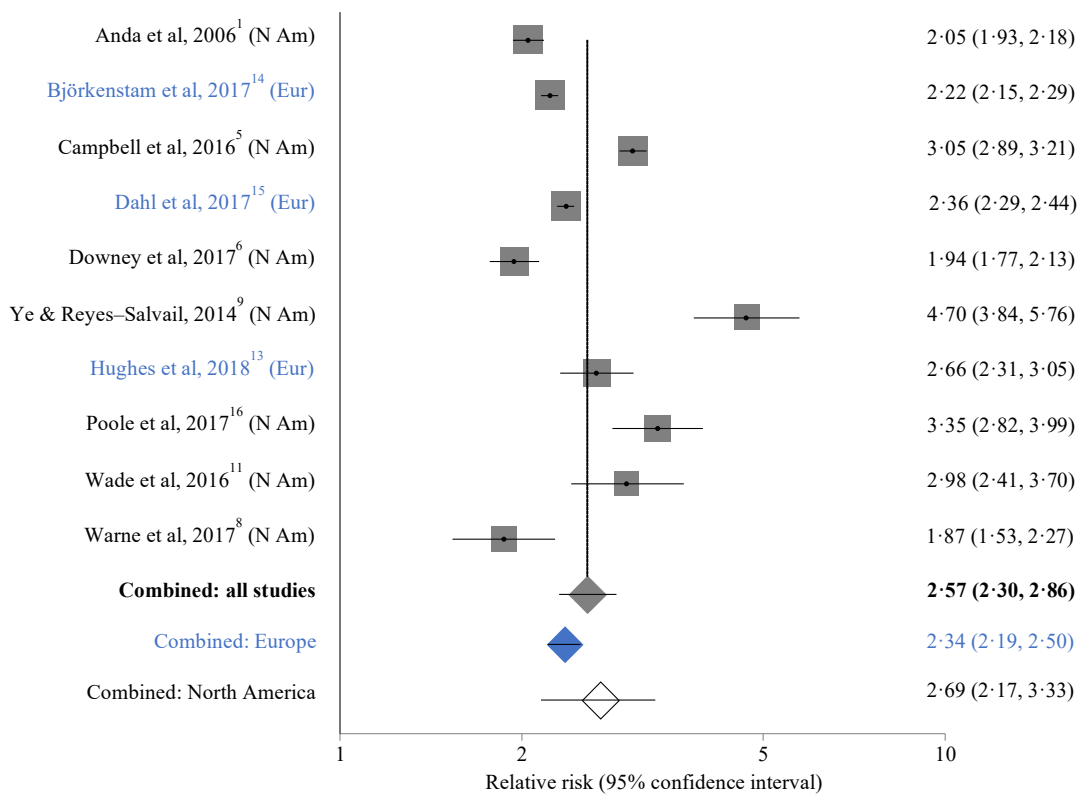

**All studies:**  $I^2 = 95.9\%$  (95% CI = 94.6% to 96.8%); Cochran Q = 220.714334 (df = 9) P < 0.0001.  
**Europe (Eur):**  $I^2 = 82.5\%$  (95% CI = 0% to 92.5%); Cochran Q = 11.449759 (df = 2) P = 0.0033.  
**North America (N Am):**  $I^2 = 96.8\%$  (95% CI = 95.6% to 97.5%); Cochran Q = 186.817324 (df = 6) P < 0.0001.



**Webfigure 9c: Increased risk of depression with 1 ACE: Funnel plot analysis**

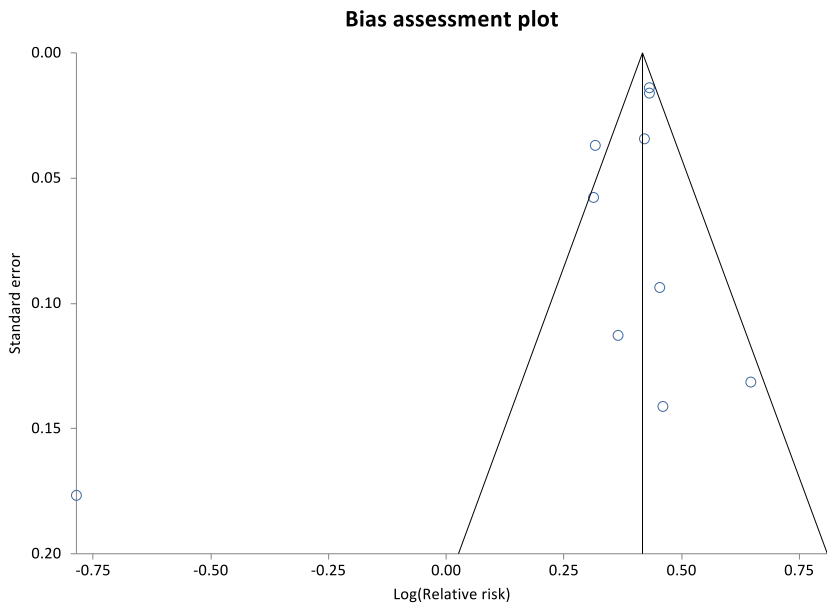

Begg–Mazumdar: Kendall's tau  $-0.244444$ ,  $P = 0.2912$ ; Egger: bias  $-1.631893$  (95% CI =  $-4.341311$  to  $1.077524$ )  $P = 0.2023$ .

**Webfigure 9d: Increased risk of depression with  $\geq 2$  ACEs: Funnel plot analysis**

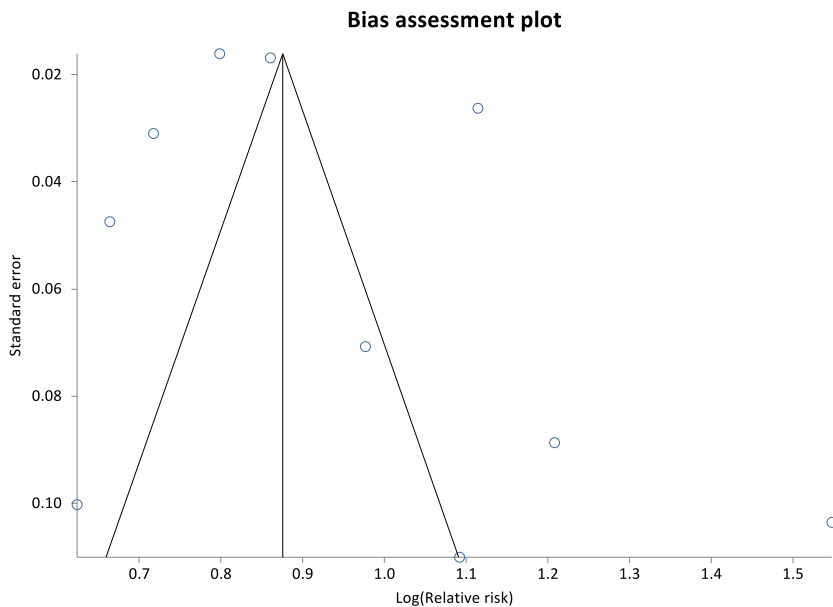

Begg–Mazumdar: Kendall's tau  $0.377778$ ,  $P = 0.1557$ ; Egger: bias  $2.456817$  (95% CI =  $3.701061$  to  $8.614696$ )  $P = 0.3845$ .

**Webfigure 10a: Increased risk of cancer with 1 ACE: summary meta-analysis plot (random effects)**

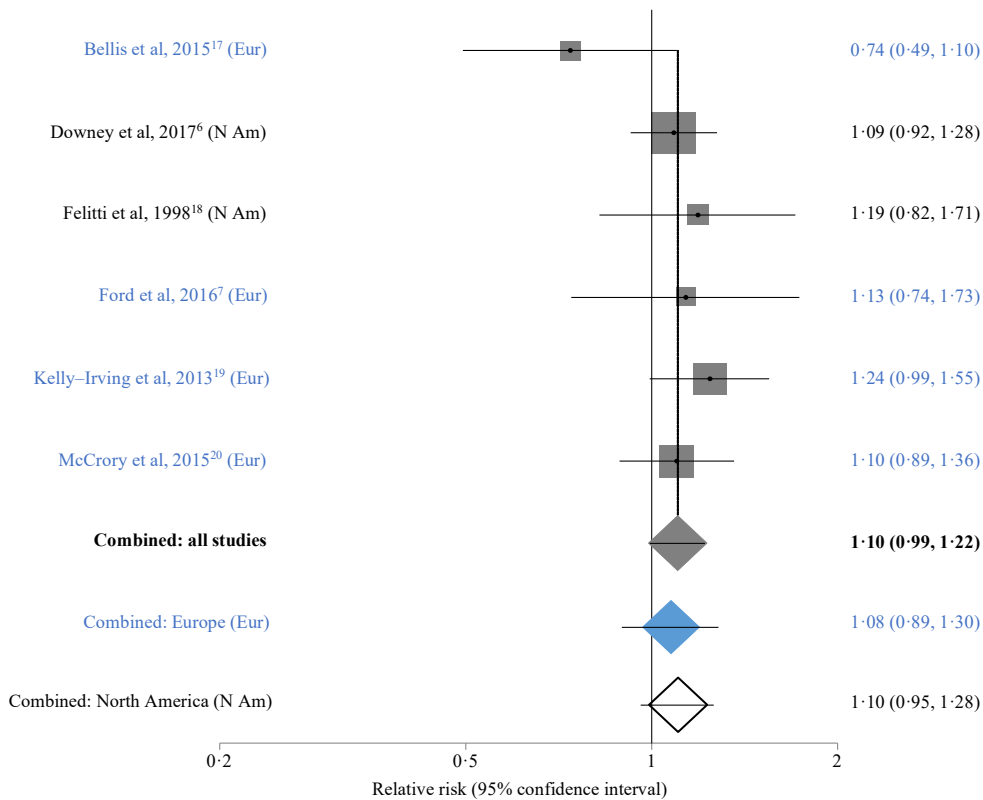

**All studies:**  $I^2 = 2.8\%$  (95% CI = 0% to 62.1%); **Cochran Q = 5.14498** (df = 5) **P = 0.3984**.  
**Europe (Eur):**  $I^2 = 39.6\%$  (95% CI = 0% to 79.1%); **Cochran Q = 4.964743** (df = 3) **P = 0.1744**.  
**North America (N Am):**  $I^2 = 0\%$  (95% CI = \*% to \*%); **Cochran Q = 0.188828** (df = 1) **P = 0.6639**.

**Webfigure 10b: Increased risk of cancer with  $\geq 2$  ACEs: summary meta-analysis plot (random effects)**

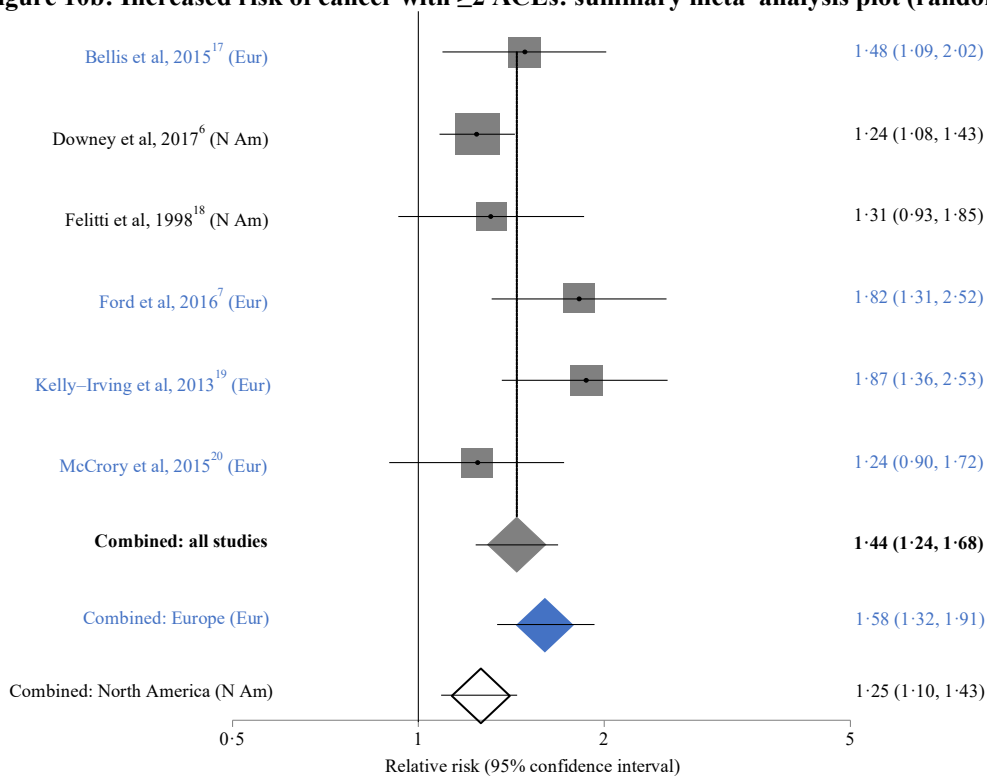

**All studies:**  $I^2 = 45.5\%$  (95% CI = 0% to 76.8%); **Cochran Q = 9.175265** (df = 5) **P = 0.1023**.  
**Europe (Eur):**  $I^2 = 25.6\%$  (95% CI = 0% to 75.4%); **Cochran Q = 4.032113** (df = 3) **P = 0.258**.  
**North America (N Am):**  $I^2 = 0\%$  (95% CI = \*% to \*%); **Cochran Q = 0.07578** (df = 1) **P = 0.7831**.

**Webfigure 11a: Increased risk of cardiovascular disease with 1 ACE: summary meta-analysis plot (random effects)**

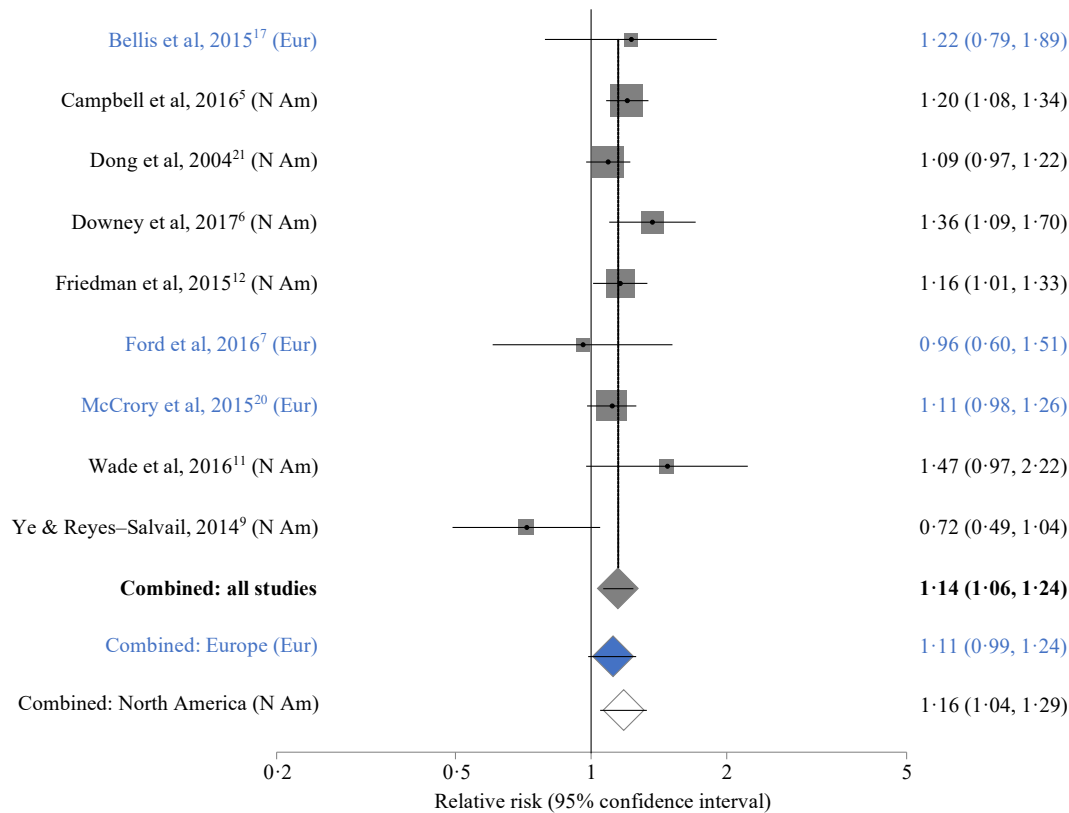

**All studies:**  $I^2 = 34.1\%$  (95% CI = 0% to 68.6%); Cochran Q = 12.138907 (df = 8) P = 0.1451.

Europe (Eur):  $I^2 = 0\%$  (95% CI = 0% to 72.9%); Cochran Q = 0.579104 (df = 2) P = 0.7486.

North America (N Am):  $I^2 = 55.2\%$  (95% CI = 0% to 80%); Cochran Q = 11.151282 (df = 5) P = 0.0485.

**Webfigure 11b: Increased risk of cardiovascular disease with  $\geq 2$  ACEs: summary meta-analysis plot (random effects)**

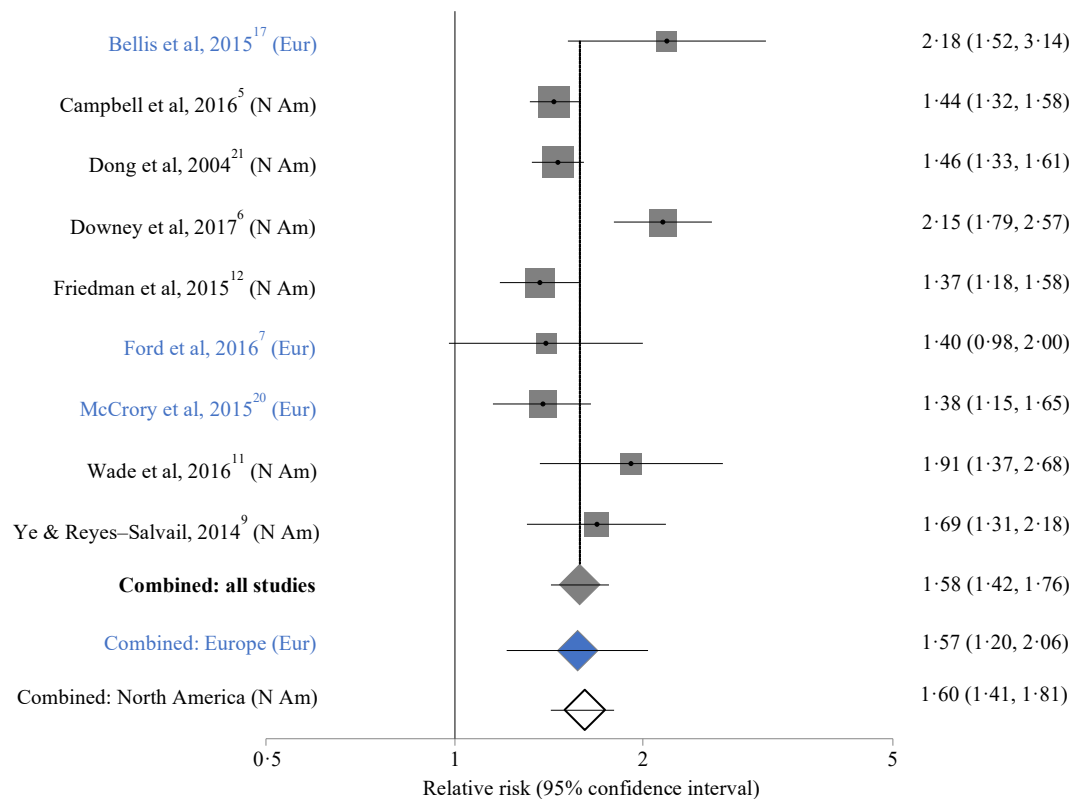

**All studies:**  $I^2 = 68.7\%$  (95% CI = 21.8% to 82.7%); Cochran Q = 25.574243 (df = 8) P = 0.0012.

Europe (Eur):  $I^2 = 59.9\%$  (95% CI = 0% to 86.7%); Cochran Q = 4.982537 (df = 2) P = 0.0828.

North America (N Am):  $I^2 = 75.7\%$  (95% CI = 26.9% to 87.4%); Cochran Q = 20.571017 (df = 5) P = 0.001.

**Webfigure 12a: Increased risk of diabetes with 1 ACE: summary meta-analysis plot (random effects)**

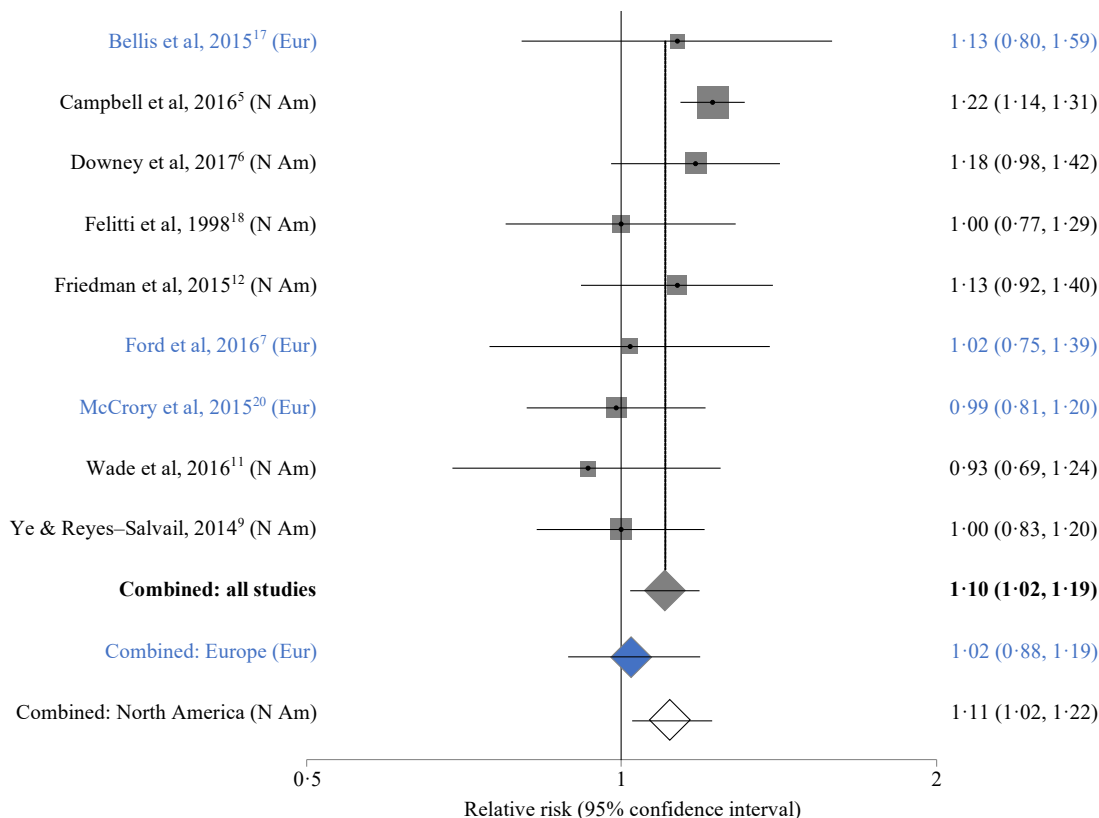

**All studies:  $I^2 = 28.9\%$  (95% CI = 0% to 66.5%); Cochran Q = 11.25188 (df = 8) P = 0.1878.**  
 Europe (Eur):  $I^2 = 0\%$  (95% CI = 0% to 72.9%); Cochran Q = 0.44664 (df = 2) P = 0.7999.  
 North America (N Am):  $I^2 = 39.3\%$  (95% CI = 0% to 74.7%); Cochran Q = 8.23386 (df = 5) P = 0.1438.

**Webfigure 12b: Increased risk of diabetes with  $\geq 2$  ACEs: summary meta-analysis plot (random effects)**

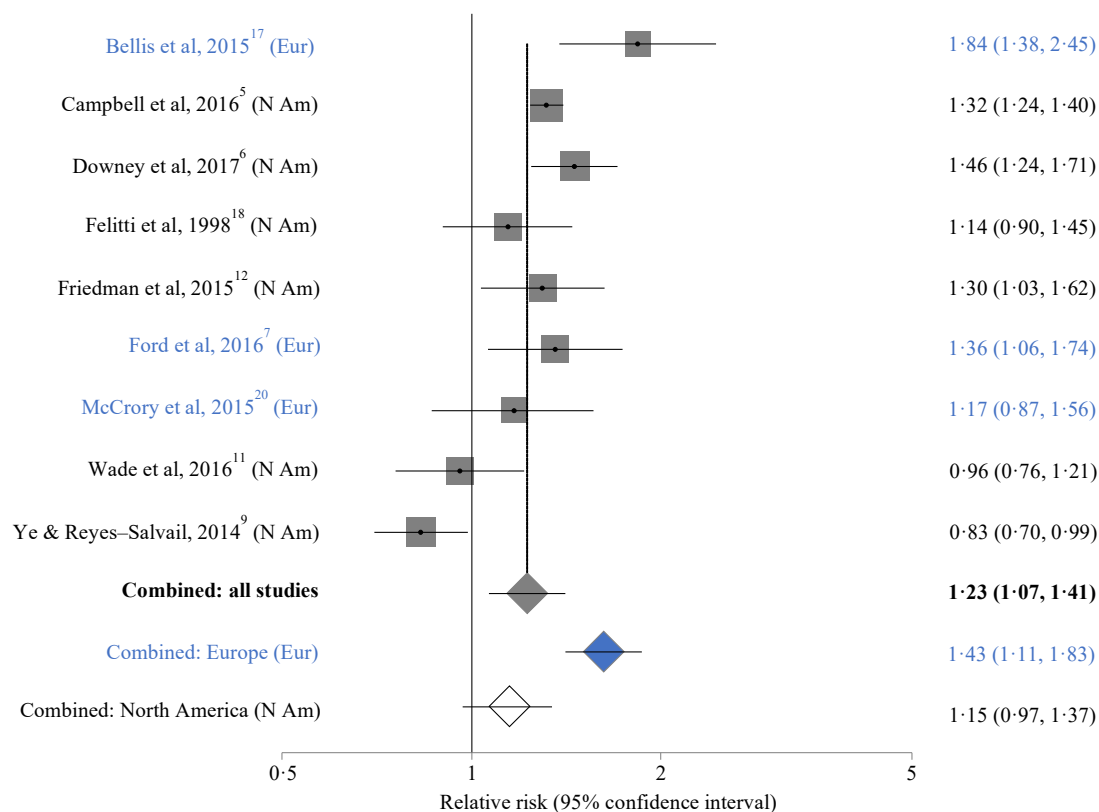

**All studies:  $I^2 = 80.6\%$  (95% CI = 60.3% to 88.2%); Cochran Q = 41.172328 (df = 8) P < 0.0001.**  
 Europe (Eur):  $I^2 = 58.7\%$  (95% CI = 0% to 86.4%); Cochran Q = 4.841264 (df = 2) P = 0.0889.  
 North America (N Am):  $I^2 = 85.3\%$  (95% CI = 66.5% to 91.5%); Cochran Q = 33.958593 (df = 5) P < 0.0001.

**Webfigure 13a: Increased risk of respiratory disease with 1 ACE: summary meta-analysis plot (random effects)**

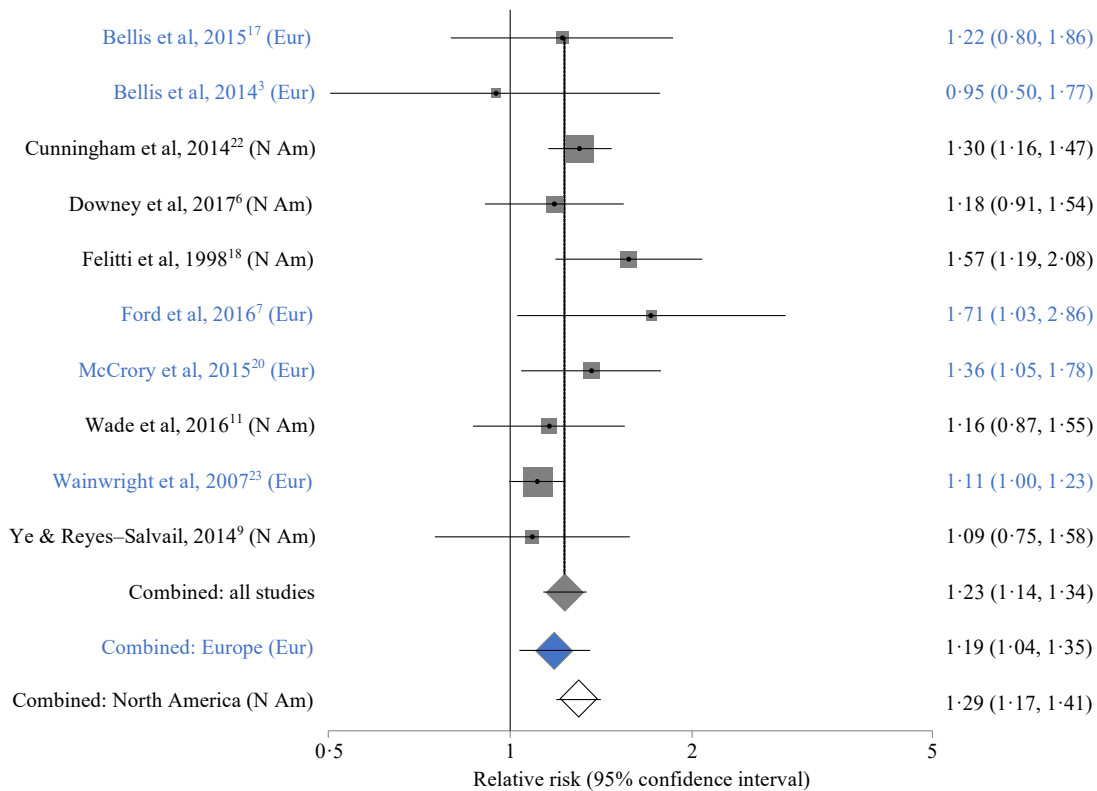

**All studies:**  $I^2 = 16.2\%$  (95% CI = 0% to 60%); Cochran Q = 10.73484 (df = 9) P = 0.2943.

**Europe (Eur):**  $I^2 = 14.7\%$  (95% CI = 0% to 69.1%); Cochran Q = 4.689212 (df = 4) P = 0.3207.

**North America (N Am):**  $I^2 = 0\%$  (95% CI = 0% to 64.1%); Cochran Q = 3.607954 (df = 4) P = 0.4617.

**Webfigure 13b: Increased risk of respiratory disease with  $\geq 2$  ACEs: summary meta-analysis plot (random effects)**

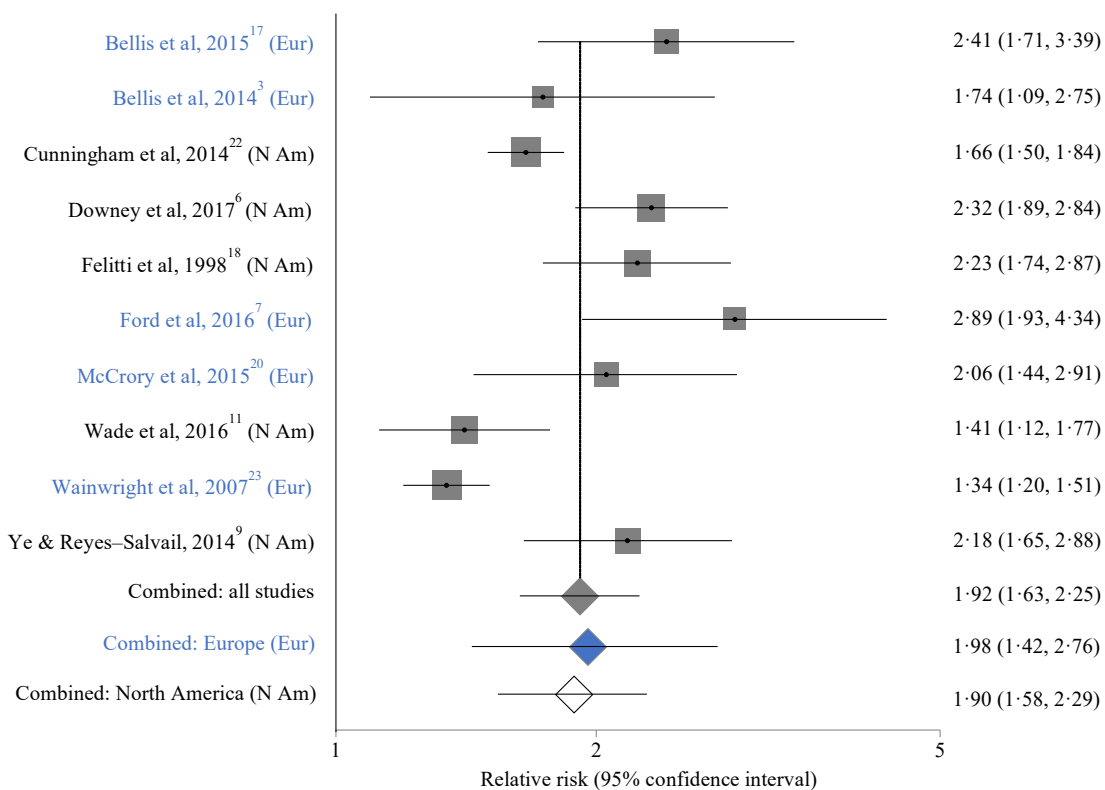

**All studies:**  $I^2 = 80.7\%$  (95% CI = 62.7% to 88%); Cochran Q = 46.710121 (df = 9) P < 0.0001.

**Europe (Eur):**  $I^2 = 83.3\%$  (95% CI = 53.1% to 91.1%); Cochran Q = 23.894287 (df = 4) P < 0.0001.

**North America (N Am):**  $I^2 = 77\%$  (95% CI = 19.4% to 88.6%); Cochran Q = 17.359866 (df = 4) P = 0.0016.

**Webfigure 13c: Increased risk of respiratory disease with 1 ACE: Funnel plot analysis**

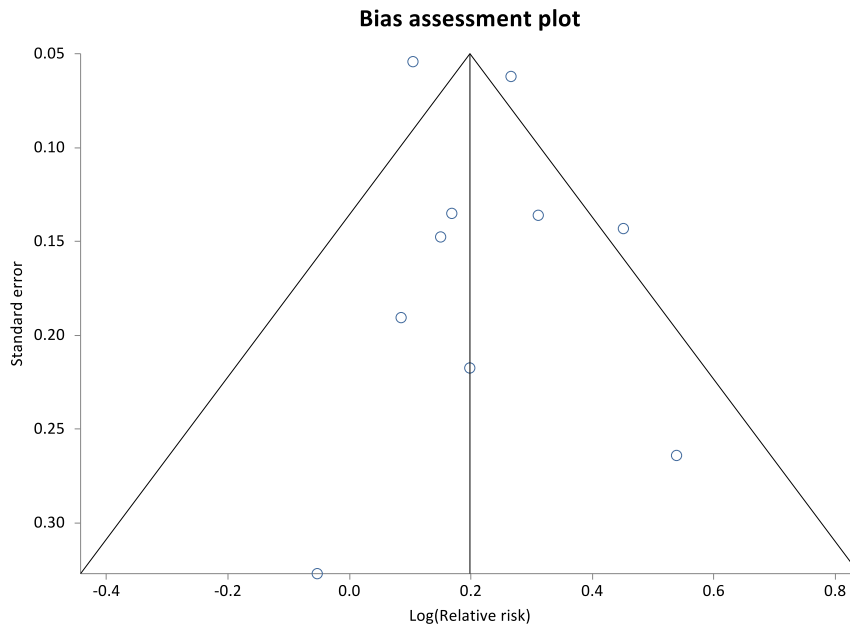

Begg–Mazumdar: Kendall's tau  $-0.066667$ ,  $P = 0.7275$ ; Egger: bias  $0.49912$  (95% CI =  $-1.064437$  to  $2.062678$ )  $P = 0.4827$ .

**Webfigure 13d: Increased risk of respiratory disease with  $\geq 2$  ACEs: Funnel plot analysis**

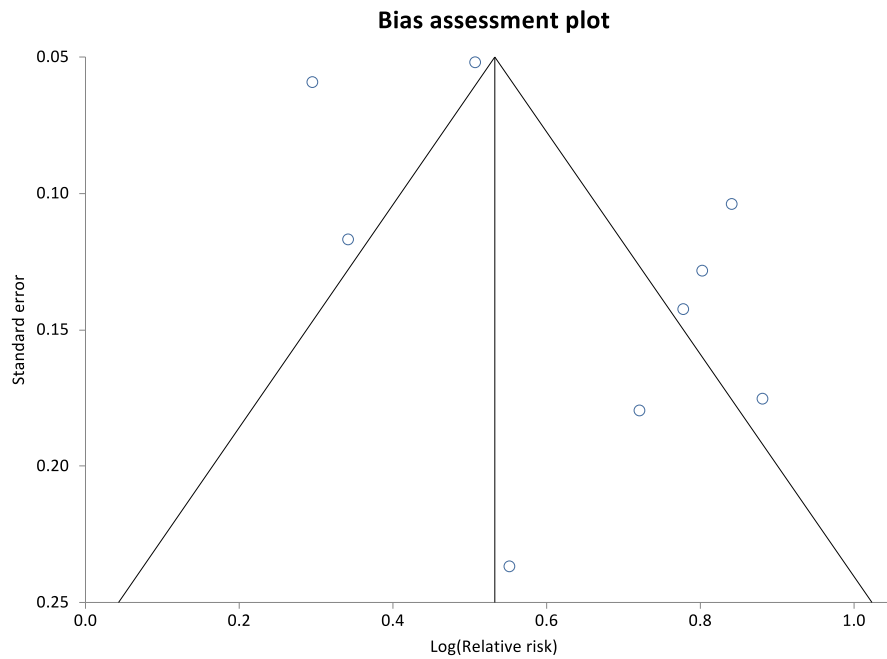

Begg–Mazumdar: Kendall's tau  $0.155556$ ,  $P = 0.6007$ ; Egger: bias  $0.935003$  (95% CI =  $0.129731$  to  $5.740274$ )  $P = 0.0423$ .

## References

1. Anda RF, Felitti VJ, Bremner JD, et al. The enduring effects of abuse and related adverse experiences in childhood: A convergence of evidence from neurobiology and epidemiology. *Eur Arch Psychiatry Clin Neurosci* 2006; **256**: 174–86.
2. Bellis MA, Hughes K, Leckenby N, Perkins C, Lowey H. National household survey of adverse childhood experiences and their relationship with resilience to health-harming behaviors in England. *BMC Medicine* 2014; **12**: 72.
3. Bellis MA, Lowey H, Leckenby N, Hughes K, Harrison D. Adverse childhood experiences: retrospective study to determine their impact on adult health behaviours and health outcomes in a UK population. *J Public Health* 2014; **36**: 81–91.
4. Bellis MA, Hughes K, Leckenby N, et al. Adverse childhood experiences and associations with health-harming behaviours in young adults: surveys in eight eastern European countries. *Bull World Health Organ* 2014; **92**: 641–55.
5. Campbell JA, Walker RJ, Egede LE. Associations between adverse childhood experiences, high-risk behaviors, and morbidity in adulthood. *Am J Prev Med* 2016; **50**: 344–52.
6. Downey JC, Gudmunson CG, Pang YC, Lee K. Adverse childhood experiences affect health risk behaviors and chronic health of lowans. *J Fam Viol* 2017; **32**: 557–64.
7. Ford K, Butler N, Hughes K, Quigg Z, Bellis MA. Adverse childhood experiences in Hertfordshire, Luton and Northamptonshire. Liverpool: Centre for Public Health, 2016.
8. Warne D, Dulacki K, Spurlock M, et al. Adverse childhood experiences (ACE) among American Indians in South Dakota and associations with mental health conditions, alcohol use and smoking. *J Health Care Poor Underserved* 2017; **28**: 1559–77.
9. Ye D, Reyes-Salvail F. Adverse childhood experiences among Hawai'i adults: findings from the 2010 Behavioral Risk Factor Survey. *Hawaii J Med Public Health* 2014; **73**: 181–90.
10. Ford ES, Anda RF, Edwards VJ, et al. Adverse childhood experiences and smoking in five states. *Prev Med* 2011; **53**: 188–93.
11. Wade Jr R, Cronholm PF, Fein JA, et al. Household and community-level adverse childhood experiences and adult health outcomes in a diverse urban population. *Child Abuse Negl* 2016; **52**: 135–45.
12. Friedman EM, Montez JK, Sheehan CM, Guenewald TL, Seeman TE. Childhood adversities and adult cardiometabolic health: Does the quantity, timing, and type of adversity matter? *J Aging Health* 2015; **27**: 1311–38.
13. Hughes K, Ford K, Davies AR, Homolova L, Bellis MA. Sources of resilience and their moderating relationships with harms from adverse childhood experiences. Wrexham: Public Health Wales, 2018.
14. Björkenstam E, Vinnerljung B, Hjern A. Impact of childhood adversities on depression in early adulthood: A longitudinal cohort study of 478,141 individuals in Sweden. *J Affect Disord* 2017; **223**: 95–100.
15. Dahl SK, Larsen JT, Petersen L, et al. Early adversity and risk for moderate to severe unipolar depressive disorder in adolescence and adulthood: A register-based study of 978,647 individuals. *J Affect Disord* 2017; **214**: 122–9.
16. Poole JC, Dobson KS, Pusch D. Childhood adversity and adult depression: the protective role of psychological resilience. *Child Abuse Negl* 2017; **64**: 89–100.
17. Bellis MA, Hughes K, Leckenby N, Hardcastle KA, Perkins C, Lowey H. Measuring mortality and the burden of adult disease associated with adverse childhood experiences in England: a national survey. *J Public Health* 2015; **37**: 445–54.
18. Felitti VJ, Anda RF, Nordenberg D, et al. Relationship of childhood abuse and household dysfunction to many of the leading causes of death in adults. The Adverse Childhood Experiences (ACE) Study. *Am J Prev Med* 1998; **14**: 245–58.
19. Kelly-Irving M, Lepage B, Dedieu D, et al. Childhood adversity as a risk for cancer: findings from the 1958 British birth cohort study. *BMC Public Health* 2013; **13**: 767.
20. McCrory C, Dooley C, Layte R, Kenny RA. The lasting legacy of childhood adversity for disease risk in later life. *Health Psychol* 2015; **34**: 687–96.
21. Dong M, Giles WH, Felitti VJ, et al. Insights into causal pathways for ischemic heart disease: adverse childhood experiences study. *Circulation* 2004; **110**: 1761–6.
22. Cunningham TJ, Ford ES, Croft JB, Merrick MT, Rolle IV, Giles WH. Sex-specific relationships between adverse childhood experiences and chronic obstructive pulmonary disease in five states. *Int J Chron Obstruct Pulmon Dis* 2014; **9**: 1033–43.
23. Wainwright NW, Surtees PG, Wareham NJ, Harrison BD. Psychosocial factors and asthma in a community sample of older adults. *J Psychosom Res* 2007; **62**: 357–61.
